1                   **Dual symbiosis in the deep-sea hydrothermal vent snail**  
2                   ***Gigantopelta aegis* revealed by its hologenome**

3  
4 Yi Lan<sup>1</sup>, Jin Sun<sup>1</sup>, Chong Chen<sup>2</sup>, Yanan Sun<sup>1</sup>, Yadong Zhou<sup>3</sup>, Yi Yang<sup>1</sup>, Weipeng Zhang<sup>4</sup>,  
5 Runsheng Li<sup>5</sup>, Kun Zhou<sup>1</sup>, Wai Chuen Wong<sup>1</sup>, Yick Hang Kwan<sup>1</sup>, Aifang Cheng<sup>1</sup>, Salim  
6 Bougouffa<sup>6,7</sup>, Cindy Lee Van Dover<sup>8</sup>, Jian-Wen Qiu<sup>5</sup>, Pei-Yuan Qian<sup>1\*</sup>

7  
8 <sup>1</sup> Department of Ocean Science, Division of Life Science and Hong Kong Branch of the  
9 Southern Marine Science and Engineering Guangdong Laboratory (Guangzhou), The Hong  
10 Kong University of Science and Technology, Hong Kong, China

11 <sup>2</sup> X-STAR, Japan Agency for Marine-Earth Science and Technology (JAMSTEC), 2-15  
12 Natsushima-cho, Yokosuka, Kanagawa Prefecture 237-0061, Japan

13 <sup>3</sup> Key Laboratory of Marine Ecosystem Dynamics, Second Institute of Oceanography, Ministry  
14 of Natural Resources, Hangzhou, China

15 <sup>4</sup> College of Marine Life Science, Ocean University of China, 5 Yushan Road, Qingdao,  
16 266003, China

17 <sup>5</sup> Department of Biology, Hong Kong Baptist University, Kowloon Tong, Hong Kong

18 <sup>6</sup> Computational Bioscience Research Centre, King Abdullah University of Science and  
19 Technology, Thuwal, 23955-6900, Saudi Arabia

20 <sup>7</sup> King Abdullah University of Science and Technology (KAUST), Core Labs, Thuwal, 23955-  
21 6900, Saudi Arabia

22 <sup>8</sup> Division of Marine Science and Conservation, Nicholas School of the Environment, Duke  
23 University, Beaufort, NC, United States

24  
25 \* Corresponding author

26 Prof. Pei-Yuan Qian

27 E-mail: boqianpy@ust.hk

28 Tel: +852-2358-7331; Fax: +852-2358-1552

29 **Abstract**

30 Animals endemic to deep-sea hydrothermal vents often form obligatory relationships with  
31 bacterial symbionts, maintained by intricate host-symbiont interactions. Endosymbiosis with  
32 more than one symbiont is uncommon, and most genomic studies focusing on such ‘dual  
33 symbiosis’ systems have not investigated the host and the symbionts to a similar depth  
34 simultaneously. Here, we report a novel dual symbiosis among the peltospirid snail  
35 *Gigantopelta aegis* and its two Gammaproteobacteria endosymbionts – one being a sulphur  
36 oxidiser and the other a methane oxidiser. We assembled high-quality genomes for all three  
37 parties of this holobiont, with a chromosome-level assembly for the snail host (1.15 Gb, N50  
38 = 82 Mb, 15 pseudo-chromosomes). In-depth analyses of these genomes reveal an intimate  
39 mutualistic relationship with complementarity in nutrition and metabolic codependency,  
40 resulting in a system highly versatile in transportation and utilisation of chemical energy.  
41 Moreover, *G. aegis* has an enhanced immune capability that likely facilitates the possession of  
42 more than one type of symbiont. Comparisons with *Chrysomallon squamiferum*, another  
43 chemosymbiotic snail in the same family but only with one sulphur-oxidising endosymbiont,  
44 show that the two snails’ sulphur-oxidising endosymbionts are phylogenetically distant,  
45 agreeing with previous results that the two snails have evolved endosymbiosis independently  
46 and convergently. Notably, the same capabilities of biosynthesis of specific nutrition lacking  
47 in the host genome are shared by the two sulphur-oxidising endosymbionts of the two snail  
48 genera, which may be a key criterion in the selection of symbionts by the hosts.

49

50 Keywords: cryptometamorphosis, methane-oxidising, sulphur-oxidising, Mollusca

## 51 Introduction

52 Animals live in harmony with microorganisms in and around them, forming ecological units  
53 referred to as holobionts. Some metazoans, for instance reef-forming corals, have established  
54 intricate obligatory symbiotic relationships with single-celled organisms that enable the  
55 holobiont to more effectively utilise the available energy source around them<sup>1</sup>. In deep-sea  
56 chemosynthetic environments such as hydrothermal vents, many endemic animals harbour  
57 endosymbiotic bacteria within their cells in order to directly access chemosynthesis utilising  
58 reducing substances such as hydrogen sulphide, hydrogen, thiosulfate, and methane<sup>2</sup>. Most of  
59 the species have evolved long-term symbiotic relationships with one dominant phylotype of  
60 microbial endosymbiont<sup>3,4,5,6</sup>. Several species of annelids and molluscs, however, are capable  
61 of hosting multiple co-occurring endosymbionts<sup>7,8,9,10</sup>. A number of studies have used genomic  
62 tools to explore the molecular mechanisms that enable and support symbioses<sup>3,4,11</sup>, but most  
63 studies focused more closely on either the symbiont or the host. Studying the symbiotic  
64 relationship by a total ‘hologenome’ approach combining high-quality genomes of both the  
65 host and the symbiont is key to understanding how the partners cooperate and collaborate to  
66 adapt and flourish in extreme environments.

67  
68 Among deep-sea vent molluscs housing endosymbionts, the two peltospirid genera  
69 *Gigantopelta* and *Chrysomallon* are perhaps the most extreme ‘holobionts’. They host the  
70 symbionts inside a specialised organ within the gut (a modified oesophageal gland) rather than  
71 on the gill epithelium like all others<sup>4,8,12,13,14,15</sup>. This means that their endosymbionts are unable  
72 to exchange material directly with the vent fluid and are completely reliant on the host for  
73 supplies of reducing substances. The two genera are thought to have evolved this symbiosis  
74 independently through convergent evolution<sup>15</sup>. A crucial difference between the two is that  
75 while *Chrysomallon* relies on endosymbionts for nutrition throughout its post-settlement life<sup>3,14</sup>,  
76 *Gigantopelta* initially adopts grazing for nutrients and only later (at around 5-7 mm shell length)  
77 rapidly shifts to hosting endosymbionts<sup>16</sup>. This process, dubbed ‘cryptometamorphosis’, occurs  
78 with a dramatic reorganisation of its digestive system where the oesophageal gland is greatly  
79 enlarged while the other parts of the digestive system effectively stop growing<sup>16</sup>.

80  
81 The fact that representatives of the two genera, *Gigantopelta aegis* and the Scaly-foot Snail  
82 *Chrysomallon squamiferum*, co-occur in great abundance in the Longqi vent field on the ultra-  
83 slow spreading Southwest Indian Ridge (SWIR) makes them ideal candidates to compare  
84 molecular adaptations in two similar-yet-different holobionts. From previous studies, we know  
85 that *C. squamiferum* hosts only one phylotype of sulphur-oxidising Gammaproteobacteria  
86 whose genome has been sequenced<sup>3</sup>. The whole genome of the host was also recently  
87 sequenced at chromosome-level<sup>17</sup>, but little has been explored in terms of its adaptations related  
88 to symbiosis. In the present study, we reveal that *Gigantopelta aegis* has a dual endosymbiosis,  
89 where the snail houses two Gammaproteobacteria endosymbionts, one sulphur-oxidising and  
90 one methane-oxidising, in its oesophageal gland. Previously, the 16S rRNA sequencing of the  
91 closely related *Gigantopelta chessoia* only revealed a single sulphur-oxidising  
92 Gammaproteobacteria symbiont<sup>18</sup>, although the transmission electron micrograph of the  
93 oesophageal gland hinted a second, rarer, methane-oxidising symbiont<sup>15</sup>. Here, we use high-  
94 quality genome assemblies of both the *G. aegis* snail host and its two physiologically distinct

95 endosymbionts to elucidate interactions and co-operations among this ‘trinity’ of parties in the  
96 holobiont. Furthermore, we compare these results to the interactions between *C. squamiferum*  
97 and its single sulphur-oxidising endosymbiont in order to understand how may *Gigantopelta*  
98 *aegis* benefit from symbiosis from more than one symbiont.

99

## 100 **Results and Discussion**

### 101 *A Holobiont with Three Parties and Hologenome Features*

102 The two genera, *Gigantopelta aegis* (dark orange) and the Scaly-foot Snail *Chrysomallon*  
103 *squamiferum* (black), occur in great abundance side-by-side at Tiamat chimney in the Longqi  
104 vent field (**Fig. 1a**). We obtained high-quality genome assemblies of all three parties in the *G.*  
105 *aegis* holobiont using an adult snail 4 cm in shell length, for in-depth analyses of its symbiosis.  
106 The host genome had a size of 1.15 Gb, comprising 15 pseudo-chromosomes with an N50 of  
107 ~82 Mb (93.8% genome completeness; **Fig. 1b, Table S1**). This is one of only a few  
108 chromosome-level genome assemblies currently available in Gastropoda or even Mollusca.  
109 The genome size of *G. aegis* is more than double of the *C. squamiferum* genome (~444.4 Mb)<sup>17</sup>  
110 mainly due to the larger contribution of repetitive regions (**Fig. S1, Fig. S2, Table S2**). The  
111 genomes of both *G. aegis* and *C. squamiferum* snails had 11 *hox* gene clusters in the same order  
112 (**Fig. S3**), 13 protein-coding genes of mito-genome in the same order (**Fig. S4**), and one-to-one  
113 chromosomal synteny (**Fig. 1c**). These indicate that much of the gene order and synteny are  
114 conserved within the family Peltospiridae, and such clear correspondences exemplify the high  
115 quality of the genome assembly for both genomes (**Fig. S5**). In addition, the genomic  
116 rearrangements that were marked by gene synteny were exclusively restricted to intra-  
117 chromosomal rather than inter-chromosomal (**Fig. 1c**). This result is also in line with our  
118 former comparative genomic analysis among four congener apple snail genomes, and the intra-  
119 chromosomal genomic rearrangements were more likely to be dominant than inter-  
120 chromosomal in shaping the genomic differences in Mollusca<sup>19</sup>. The genetic regulatory  
121 networks and related functional differences among them are underpinned by intra-  
122 chromosomal rearrangements, but how exactly warrants further studies. A total of 21,472 genes  
123 (**Table S3**) were predicted from the *G. aegis* genome, of which 1,783 genes were highly  
124 expressed in the oesophageal gland. No particular chromosomal distribution bias was observed  
125 among these genes (**Fig. 1b**).

126

127 Transmission electron micrographs of the oesophageal gland from *Gigantopelta aegis*  
128 confirmed the existence of intracellular endosymbionts densely packed inside bacteriocytes  
129 (**Fig. 2a, Fig. S6**). Two types of endosymbionts with distinct morphology features were found  
130 within a single bacteriocyte (**Fig. 2a**). Sequences of the 16S ribosomal RNA from oesophageal  
131 glands of three *G. aegis* individuals revealed that the two types of symbionts both belong to  
132 Gammaproteobacteria, the more abundant one being sulphur-oxidising bacteria (SOB hereafter)  
133 and the rarer one being methane-oxidising bacteria (MOB hereafter) in the family  
134 Methylococcaceae. Indeed, of the two symbionts identified from TEM, one exhibited  
135 intracellular stacked membranes (**Fig. 2a**) which is a characteristic of Type I methanotroph<sup>12</sup>,  
136 and the other lacked it. Fluorescence *in situ* hybridisation (FISH) carried out on transverse  
137 sections of the oesophageal gland from *G. aegis* yielded positive signals of both the SOB and  
138 the MOB (**Fig. 2b, Fig. S6**). These results confirm that *G. aegis* is a holobiont with three active

139 parties, including the host and two physiologically distinct types of endosymbionts from  
140 Gammaproteobacteria. Genome binning results showed the SOB, the MOB, and the host could  
141 be separated with high fidelity by their GC content and sequencing coverage (**Fig. S7**). Both  
142 the TEM results and the sequencing coverage indicate that both endosymbionts are common  
143 in the oesophageal gland, with the SOB being approximate seven times more abundant than  
144 the MOB in this individual (**Table S4**). However, the relative abundance of the two symbionts  
145 possibly varies due to the fluctuant concentration of sulphur substances and methane, as was  
146 observed in *Bathymodiolus* mussels which have two symbionts<sup>20,21</sup>.

147  
148 The assembled genomes of the SOB (98.55% genome completeness; 11 scaffolds of 4.91 Mb;  
149 5,518 genes) and the MOB (99.25% genome completeness; 10 scaffolds of 2.93 Mb; 3,102  
150 genes) (**Table S4, Table S5, Table S6**) showed different genomic features in terms of GC  
151 content of the deviation from the average 37.22%, GC skew, and annotated Clusters of  
152 Orthologous Groups (COG) (**Fig. 2c**; for details of assembly and functional annotation see  
153 Supplementary Materials). Bacterial sequences were barely detectable in the scaffolds of *G.*  
154 *aegis*, suggesting a lack of horizontal gene transfer from the prokaryote. The CheckM analysis  
155 confirmed the high quality of the two symbionts genomes, as the potential contamination was  
156 low (3.25% in SOB, 1.67% in MOB, **Table S4**). In the metaproteomic analyses of the three  
157 parties, a total of 704 proteins were identified in the host (**Table S7**), 462 proteins in the SOB  
158 (**Table S8**), and 119 proteins (**Table S9**) in the MOB, which provide additional protein  
159 evidence to trace the metabolism of *G. aegis* holobiont.

#### 160 161 *Evolution of Symbiosis in Deep-sea Peltospirid Snails*

162 Molecular clock methods based on 1,066 single-copy genes suggests that the two deep-sea  
163 peltospirid snails, *G. aegis* and *C. squamiferum*, diverged approximately 117.94 million years  
164 ago (Ma; 95% confidence intervals: 68.73~187.03 Ma) (**Fig. 3a**), which is consistent with  
165 previous evidence that the ancestor of peltospirids extends to the Late Cretaceous and the order  
166 Neomphalida likely had a mid-Jurassic origin<sup>15</sup>. Despite occupying the same microhabitat, the  
167 peltospirid snails *G. aegis* and *C. squamiferum* host different lineages of sulphur-oxidising  
168 endosymbionts (**Fig. 3b, Table S10**), consistent with the horizontal acquisition of symbionts<sup>8,18</sup>  
169 and host-specific selectivity of symbionts relying on the pattern recognition receptors<sup>22</sup>. The  
170 host-specific selectivity for different lineages of gammaproteobacterial endosymbionts in  
171 peltospirids is in line with a previous study indicating that they have independent origins of  
172 endosymbioses<sup>15</sup>. In contrast, provannid *Alviniconcha* snails (*Alviniconcha strummeri*, *A.*  
173 *kojimai*) from vent fields at the Eastern Lau Spreading Center<sup>8</sup> have been found to be capable  
174 of accepting a wide range of endosymbionts in each host species, and the endosymbiont has an  
175 impact on the holobiont's niche utilisation<sup>23</sup>. This difference between peltospirids and  
176 provannids likely indicates that housing endosymbionts in an internal organ is associated with  
177 higher host selectivity of endosymbionts.

178  
179 Despite the divergent phylogenetic distances between the sulphur-oxidising endosymbionts in  
180 the two peltospirid snails, the gene content encoding for nutrition metabolism in the symbionts  
181 are similar, and the same goes for the two peltospirid hosts (**Table 1**). Divergence of hosts and

182 their SOB's at the genome level together with the convergence of host and SOB gene content  
183 relating to nutrition again indicate that the peltospirid snails established their symbiotic  
184 relationships through convergent evolutionary pathways. Therefore, the selection of the  
185 symbionts may have been based on their capability of the biosynthesis of specific nutrients,  
186 especially key amino acids and vitamins that the hosts are unable to synthesise themselves.

187

### 188 *Genetic Control of Symbiont Acquisition*

189 The immune response of the host is critical for symbiont infection and colonisation. Among  
190 the shared gene families of *G. aegis* and 18 other lophotrochozoan genomes (**Fig. S8**), several  
191 immune-related gene families were expanded in *G. aegis* (**Table S11**). For example, the gene  
192 families fucoselectin (FUCL) and galectin (Gal) were prominently expanded in *G. aegis* (**Fig.**  
193 **4a**). These lectins allow host cells to bind with carbohydrate recognition domains on the  
194 bacterial surface, resulting in recognition of beneficial bacteria and elimination of detrimental  
195 microbes via antimicrobial activity<sup>22</sup>. In comparison to *C. squamiferum*, *G. aegis* harbours  
196 much more abundant pattern recognition receptors, including peptidoglycan recognition  
197 proteins (PGRP), toll-like receptors (TLR), fibrinogen-related proteins (FBG), and C-type  
198 lectins (CLEC) (**Fig. 5**). These receptors are thought to help other chemosymbiotic host  
199 animals, such as siboglinid tubeworms and bathymodiolin mussels, to respond to the microbes  
200 appropriately as well as assist the acquisition and maintenance of their symbiont populations<sup>22</sup>.  
201 Pattern recognition receptors that are highly expressed in the oesophageal glands are likely  
202 related to the recognition of the endosymbionts. From gene expression patterns, all PGRPs are  
203 highly expressed in the oesophageal glands of both peltospirid snails, suggesting PGRPs play  
204 an important role in the establishment of the symbiosis in deep-sea peltospirid snails. The  
205 abundance and high expression of PGRPs may help the host to regulate the symbiont  
206 population<sup>22</sup> via the digestion process (**Table S12**), resulting in efficient utilisation of  
207 environmental chemical compounds whose concentrations are expected to fluctuate. Besides  
208 PGRPs, many other pattern recognition receptors, particularly those belonging to the gene  
209 family TLR, are highly expressed in the oesophageal gland of *G. aegis* compared to *C.*  
210 *squamiferum* (**Fig. 5**). Although *G. aegis* occupies the same habitat in the Longqi vent field as  
211 *C. squamiferum*, these additional pattern recognition receptors may enable *G. aegis* to host two  
212 distinct endosymbionts.

213

214 There is also genomic evidence that the symbionts of the *G. aegis* peltospirids play a role in  
215 the invasion of the host. The peptidoglycan-associated lipoprotein Pal that can bind with TLR  
216 protein families<sup>8</sup> was expressed in the transcriptomes and proteomes of the *G. aegis* SOB  
217 (**Table S5, Table S8**). Furthermore, both the SOB and the MOB of *G. aegis* contained OmpA  
218 family proteins and OmpH family proteins (**Table S5, Table S6**), which could interact with  
219 TLR and scavenger receptors to help the bacteria invade and adapt to the intracellular  
220 environment<sup>24</sup>. These symbiont attributes could help the host establish an endosymbiotic  
221 lifestyle.

222

### 223 *Energy Resources*

224 Previous reports showed that the concentrations of reduced components (i.e., CH<sub>4</sub>, sulphur  
225 substances, and hydrogen) in the endmember fluid from the Longqi field are comparable or

226 higher than those in the vents along the Central Indian Ridge<sup>25,26,27</sup>. Although methane is  
227 enriched in Longqi compared to other vents on the Central Indian Ridge<sup>26</sup>, further biogenic  
228 methane input from microbes living below and around the community may be sufficient to  
229 sustain the MOB. The blood vascular system of the host snail transports these essential  
230 dissolved compounds from the vent fluid, together with oxygen from the surrounding seawater,  
231 to the SOB and MOB (**Table S13**). The dual symbionts are highly versatile in utilising those  
232 chemical substances, respectively (**Fig. 6a**). The central metabolism, associated gene  
233 expression levels, and protein abundance levels of the symbionts are summarised in **Figure 6**.

234  
235 The genome data indicate that the sulphur metabolism in the SOB of *G. aegis* (**Fig. 6a**) is  
236 similar to that of the *C. squamiferum* snail SOB, *Alviniconcha* snail gamma SOB and siboglinid  
237 tubeworm gamma SOB<sup>3,5</sup>. The proteins of *soxA* (35th in proteome), *dsrB* (21th in proteome),  
238 *sqr* (34th in proteome), *aprA* (6th in proteome), *aprB* (63th in proteome), and *sat* (57th in  
239 proteome) (**Fig. 6**) have a high expression level, indicating their active engagement in oxidising  
240 thiosulfate, sulphite, and sulphide in the environment and to detoxify sulphide for the holobiont.

241  
242 Like many sulphur-oxidising endosymbionts of vent molluscs<sup>3,4,28</sup>, the SOB of *G. aegis* relies  
243 on the complete Calvin-Benson-Bassham (CBB) cycle to fix CO<sub>2</sub> by using a form II ribulose-  
244 bisphosphate carboxylase (the protein of *cbmM* gene: 2nd in proteome) that was found the  
245 highest protein expression level and lacks a complete rTCA cycle (**Fig. 6**).  
246 Phosphoribulokinase (the protein of *prkB* gene: 15th in proteome), type I glyceraldehyde-3-  
247 phosphate dehydrogenase (the protein of *gapA* gene: 16th in proteome), and transketolase (the  
248 protein of *tkt* gene: 43th in proteome) playing important roles in CBB cycle for carbon fixation  
249 also exhibited high protein expression levels in the SOB (**Fig. 6**).

250  
251 The MOB of *G. aegis* has neither a complete CBB cycle nor an rTCA cycle pathway for CO<sub>2</sub>  
252 fixation. However, the *G. aegis* MOB possesses the methane monooxygenase operon (*pmoA*  
253 gene: 5th in transcriptome, 50th in proteome; *pmoB* gene: 6th in transcriptome, 1st in proteome;  
254 *pmoC* gene: 1st in transcriptome, 10th in transcriptome) with top 1% gene expression enabling  
255 it to oxidise methane (**Fig. 6b, Fig. S9**), confirming that methane oxidation is among the most  
256 prominent metabolic processes in the MOB. In the tetrahydromethanopterin (H4MPT) pathway,  
257 the high expression level of the formaldehyde activating enzyme (*fae* gene: 65th in  
258 transcriptome, 20th in proteome) indicates an active generation of CO<sub>2</sub> via formaldehyde  
259 oxidation. Then CO<sub>2</sub> could be redirected to the CBB cycle of the SOB to form an internal  
260 carbon cycle among the symbionts. Internal carbon cycling among symbionts has been detected  
261 in the internal symbiotic organs (trophosomes) of vent siboglinid tubeworms<sup>29</sup>. This would  
262 allow the symbionts to maximise carbon efficiency within the trophosome-like oesophageal  
263 glands and trophosomes in the absence of direct interaction with CO<sub>2</sub>-rich seawater and vent  
264 fluids.

265  
266 Aerobic methanotrophs are classified into two groups based on their formaldehyde assimilation  
267 pathways: Type I group (part of Gammaproteobacteria) using a ribulose  
268 monophosphate (RuMP) cycle and Type II group (part of Alphaproteobacteria) using a serine  
269 cycle. Methane-oxidising symbionts usually belong to Type I and only use the RuMP cycle;

270 examples include the methane-oxidising symbionts of deep-sea *Bathymodiolus* mussels, snails,  
271 and sponges (referred-to genomes in **Fig. 3b**). The MOB of *G. aegis*, however, surprisingly  
272 possesses a complete serine cycle in addition to a complete RuMP cycle (**Fig. 6a**). This can  
273 mitigate the accumulation and toxicity of formaldehyde when formaldehyde is in excess for  
274 the RuMP pathway. In the RuMP cycle, high expression of 3-hexulose-6-phosphate synthase  
275 (*hxlA* gene: 20th in transcriptome) and 6-phospho-3-hexuloisomerase (*hxlB* gene: 25th in  
276 proteome) in the Entner-Doudoroff (EDD) pathway indicate an important role for  
277 formaldehyde oxidation (**Fig. 6**). Furthermore, the MOB genome possesses an additional  
278 Embden-Meyerhof-Parnas (EMP) pathway for glycolysis (**Fig. 6a**), absent in other methane-  
279 oxidising endosymbionts (referred in **Fig. 3b**). These results indicate that MOB of *G. aegis* are  
280 highly efficient and versatile in assimilating carbon sources from methane.

281

### 282 *Respiration*

283 Both the SOB and the MOB housed in the oesophageal glands of *G. aegis* are capable of using  
284 nitrate as an electron acceptor for anaerobic respiration. Their genomes encode genes for nitrate  
285 reduction, such as nitrate reductase (*napAB* and *nasA* in SOB, *narGHI* in MOB), nitrite  
286 reductase (*nirBDS* in SOB, *nirBDK* in MOB), and nitric oxide reductase (*norBC* in the SOB  
287 and the MOB) (**Fig. 6, Fig. S10**), which are also found in sulphur-oxidising symbionts of  
288 tubeworms, mussels, and other gastropods but not in the methane-oxidising symbionts of  
289 mussels and sponges<sup>3,5,28,30</sup>. As the *G. aegis* symbionts rely on the host's blood vessels for  
290 oxygen supply while input from the hydrothermal vent fluctuates due to the constant interplay  
291 between the oxygen-poor vent fluid and the oxygen-rich seawater, there may be periods when  
292 the oxygen supply runs low in the oesophageal gland. Indeed, hemocyanin, hemoglobin, and  
293 globin-like genes playing a role in oxygen binding and transport have lower gene expression  
294 in the oesophageal gland and higher expression in the foot and mantle while five sialin genes  
295 used for transporting nitrate were highly expressed in the oesophageal gland (**Fig. S11**).  
296 Therefore, these symbionts might have developed abilities to avoid oxygen competition with  
297 the host, especially under potential periodic hypoxic conditions.

298

### 299 *Holobiont Nutritional Interdependence*

300 The SOB do not have *mdh*, *pdhD* and *sucA* genes in the TCA cycle while the homologous  
301 genes of those missing in the SOB are highly expressed in the MOB. The SOB does have a C4-  
302 dicarboxylate TRAP transport system (DstPQM) that would allow the uptake of four-carbon  
303 compounds involved in the TCA cycle<sup>8</sup>, indicating that the SOB likely replenishes the missing  
304 intermediates of the TCA cycle from the other symbiont partner.

305

306 Both the *G. aegis* and *C. squamiferum* host genomes lack the capability of the biosynthesis of  
307 7 amino acids (isoleucine, valine, leucine, lysine, histidine, phenylalanine, and tryptophan), 6  
308 vitamins (vitamin B1, vitamin B2, vitamin B5, vitamin B7, vitamin B9, and vitamin B12), and  
309 2 cofactors (siroheme and coenzyme A; **Table 1**). However, these nutrients, except vitamin B5  
310 and coenzyme A, can be obtained from their SOB through host lysis symbiont cells (**Table**  
311 **S12**). The MOB of *G. aegis* has a complete pathway to synthesise vitamin B5 and coenzyme  
312 A, whereas the SOBs of two peltospirids lacks a key gene 2-dehydropantoate 2-reductase



313 (*panE*) for generating pantoate, the key substrate for producing pantothenate (**Fig. S12**). We  
314 speculate two possibilities: 1) the SOB, particularly of *C. squamiferum*, has a replacement of  
315 2-dehydropantoate 2-reductase or replenishment for the biosynthesis of pantothenate and  
316 coenzyme A like in the pea amphid holobiont<sup>31</sup>, or 2) in the *G. aegis* holobiont, MOB serves  
317 as the major source for providing pantothenate and coenzyme A to both the SOB and the host.  
318 In return, the host can provide the SOB and the MOB with methionine, tyrosine, vitamin B3,  
319 and vitamin B6 through the symbionts' ATP-binding cassette transporters of amino acids.  
320 These host-supplied nutrients are critical for fulfilling the nutritional demands of the  
321 endosymbionts housed in an internal organ lacking direct contact with the outside world.

322

### 323 *Transposase Expansion in Three Partners of the Gigantopelta aegis Holobiont*

324 The enrichment of the transposable elements (TE) provides beneficial genomic plasticity for  
325 adaptation to an intracellular symbiotic life by regulating nearby genes<sup>32</sup>. In the results from  
326 the gene family analysis, expansion of TEs were found in all three parties comprising *G. aegis*  
327 holobiont (**Fig. 4**). For the host *G. aegis*, these expansions correspond to 342 transposase genes  
328 (1.6% of total host genes) and 510 DNA transposons (2.4% of total host genes); for SOB  
329 symbionts, these expansions correspond to 704 transposase genes (12.8% of total SOB genes);  
330 and for the MOB symbionts, these expansions correspond to 345 transposase genes (11.1% of  
331 total MOB genes). Numerous transposase genes were unusually inserted into the flagellar  
332 operons and chemotaxis operons playing an important role in host infection by both SOB and  
333 MOB of *G. aegis*. This may contribute to the regulation of the symbionts motility for infection  
334 and colonisation in the host environment. To our knowledge, the expansion of transposase  
335 genes occurring across multiple symbiotic partners within the same holobiont has not been  
336 reported in any marine invertebrate holobionts.

337

### 338 **Conclusions**

339 We revealed that the deep-sea peltospirid snail *Gigantopelta aegis* endemic to hydrothermal  
340 vent exhibits a dual symbiotic lifestyle, which includes dominant sulphur-oxidising  
341 Gammaproteobacteria and less dominant methane-oxidising Gammaproteobacteria (Type I  
342 methanotroph). Furthermore, we provide a high-quality hologenome including a chromosome-  
343 level assembly for the snail host and an in-depth analysis of the genomic interdependencies  
344 among the trinity of symbiotic partners in this holobiont, finding an intimate mutualistic  
345 relationship with complementarity in nutrition and metabolic codependency. The two  
346 endosymbionts live in an organ lacking direct interaction with the ambient environment. Both  
347 symbionts as well as the host are highly versatile with regards to the transportation and  
348 utilisation of chemical energy, increasing the efficiency of carbon fixation by forming an  
349 internal carbon cycle among the two symbionts. Although *G. aegis* and another  
350 chemosymbiotic peltospirid snail *Chrysomallon squamiferum* occupy the same habitat in the  
351 Longqi vent field, *C. squamiferum* has a single sulphur-oxidising symbiont. The fact that the  
352 sulphur-oxidising endosymbionts of both snails are not particularly closely related  
353 phylogenetically but have essentially the same capabilities of the biosynthesis of specific  
354 nutrition suggest that this may be a key criterion for the selection of symbionts by the snail  
355 hosts.

356

## 357 **Materials and Methods**

### 358 *Deep-Sea Sampling*

359 *Gigantopelta aegis* snails were collected by the manned submersible HOV *Jiaolong* on-board  
360 the R/V *Xiangyanghong 9* cruise 35II from Longqi hydrothermal vent field (37.7839°S,  
361 49.6502°E; 2,761 m depth) on the Southwest Indian Ridge in January 2015. Snails were  
362 immediately flash-frozen in liquid nitrogen once they were recovered on the ship. They were  
363 then transferred to -80 °C until DNA and RNA extraction. Specimens of *G. aegis* for Hi-C  
364 sequencing and fluorescence *in situ* hybridisation (FISH) experiments were collected also from  
365 Longqi ('Tiamat' chimney) during Leg 3 of the COMRA R/V *Dayang Yihao* expedition 52 in  
366 April 2019. Tissue from the foot was immediately dissected from one individual, cut up,  
367 washed in phosphate-buffered saline buffer, and stored at -80 °C until Hi-C library preparation.  
368 The oesophageal gland tissue was dissected from the same individual and fixed in 4%  
369 paraformaldehyde overnight, followed by dehydration through an ethanol series (20%, 40%,  
370 60%, and 80%) for 15 minutes each and stored at -80 °C until fluorescence *in situ* hybridisation  
371 experiments. Samples for transmission electron microscopy (TEM) were immediately fixed in  
372 10% buffered formalin after recovery on-board the research vessel. Identity of the specimens  
373 was confirmed by both mitochondrial *COI* sequences and morphology.

374

### 375 *TEM*

376 The oesophageal gland tissue was dehydrated using a series of graded acetone and then  
377 transferred into Epon resin (Sigma-Aldrich) for embedding. An ultramicrotome (Reichert  
378 Ultracut S, Leica) was used to slice ultrathin (70 nm) sections that were used for staining in 2%  
379 aqueous uranyl acetate with lead stain solution (0.3% lead acetate and 0.3% lead nitrate, Sigma-  
380 Aldrich). The presence of intracellular symbionts was confirmed using a Tecnai 20  
381 Transmission Electron Microscopy (FEI) at an acceleration voltage of 120 kV. For more  
382 detailed methods for thin-section preparation see ref 15.

383

### 384 *FISH*

385 The oesophageal gland tissues were dehydrated in 100% ethanol and embedded in Shandon  
386 Cryomatrix Frozen Embedding Medium (6769006; Thermo Fisher Scientific). After full  
387 embedding, they were quickly frozen in dry ice. Cryostat sections 10 µm in thickness (CryoStar  
388 NX70; Thermo Fisher Scientific) were cut and mounted on glass slides. Two 16S rRNA-based  
389 probes were designed to target the endosymbionts specifically. The Cy3-labelled SOB1 probe  
390 (5'-AGCATATTAAACTTGTACCC-3') was used to target the sulphur-oxidising  
391 endosymbiont, and the Cy5-labelled MOB1 probe (5'-CGTGTGTTTTCTCCCTTCT-3')  
392 was used to bind the methane-oxidising endosymbiont. The sections were rehydrated in a  
393 decreasing ethanol series (95%, 80%, and 70%) for 15 minutes each and hybridised at 46 °C  
394 with 50 ng/ml of each probe in a hybridisation buffer (0.9 M NaCl, 0.02M Tris-HCl, 0.01%  
395 sodium dodecyl sulphate and 20% formamide) for 3 hours. Then, the slides were washed in a  
396 wash buffer (0.1 M NaCl, 0.02 M Tris-HCl, 0.01% sodium dodecyl sulphate, 5 mM EDTA) at  
397 48 °C for 15 min. Two drops of 4',6-diamidino-2-phenylindole (DAPI) were added on each  
398 slide followed by incubation at room temperature for 3 min. After washing and air drying, the  
399 slides were mounted by coverslips with SlowFade™ Diamond Antifade Mountant medium

400 (Invitrogen, Carlsbad, CA, USA). Images were taken using a confocal microscope (Leica  
401 Microsystems, Wetzlar, Germany) with a 3D model, and post-processed by LAS X software  
402 (Leica Microsystems, Wetzlar, Germany).

403

#### 404 *DNA Extraction and Illumina Sequencing of the Hologenome*

405 The MagAttract High-Molecular-Weight DNA Kit (QIAGEN, Hilden, Netherlands) was used  
406 to extract high-molecular-weight genomic DNA from the oesophageal gland and the foot  
407 separately for sequencing of the genome of the symbionts and the host, respectively, following  
408 manufacturer's protocols. The extracted DNA was further purified by Genomic DNA Clean &  
409 Concentrator™-10 kit (ZYMO Research, Irvine, CA, USA). The DNA was finally eluted in  
410 10mM Tris-HCl buffer (pH=8.5). The quality of the genomic DNA was evaluated using a  
411 BioDrop µLITE (BioDrop, Cambridge, UK) with the OD 260/280 of 1.8 and the OD 260/230  
412 of 2.0–2.2. The DNA concentration was assessed using a Quibit™ 3 Fluorometer (Thermo  
413 Fisher Scientific, Singapore). The sizes of DNA fragments were assessed by pulsed-field gel  
414 electrophoresis. Approximate 1 µg DNA of each tissue, including foot and oesophageal gland,  
415 were used for the short-insert library (350 bp and 500 bp) in an Illumina NovaSeq 6000  
416 platform to generate 171 Gb and 49 Gb paired-end reads with a length of 150 bp, respectively.

417

#### 418 *Oxford Nanopore Technologies (ONT) library preparation and MinION sequencing*

419 The DNA of the oesophageal gland was used to prepare the long-read library (Oxford  
420 Nanopore MinION, UK) for genome sequencing of endosymbionts. To construct the MinION  
421 library, a NEBNext Ultra II End-Repair/dA-tailing Module (NEBE7546) kit was used to  
422 perform DNA repair and end-prep. A Ligation Sequencing Kit (SQK-LSK109) was used to  
423 perform adaptor ligation and clean-up with the large DNA fragments. A Flow Cell Priming Kit  
424 (EXP-FLP001) was used to prepare the priming buffer to prime the MinION flow cells (FLO-  
425 MIN106D R9 version). The Library Loading Bead Kit R9 version (EXP-LLB001) was used to  
426 assist in loading the libraries into the flow cells. Sequencing was started immediately in the  
427 MinION™ portable single-molecule nanopore sequencer (Oxford Nanopore Technologies  
428 Limited, UK) using the software MinKNOW version 3.1.8 (Oxford Nanopore Technologies  
429 Limited, UK). The read event data was base-called by Oxford Nanopore basecaller Guppy  
430 version 2.1.3<sup>33</sup> with default settings.

431

#### 432 *Single-Molecule Real-Time (SMRT) Library Construction and PacBio Sequel Sequencing*

433 For genome sequencing of the host animal, the purified DNA of the foot from one individual  
434 was utilised to construct PacBio single-molecule real-time (SMRT) library (Pacific  
435 Biosciences, USA). BluePipin (Sage Science, USA) was utilised to select long DNA fragments  
436 with sizes between 8 kb to 50 kb for PacBio library construction. Universal hairpin adapters  
437 were used to ligate the DNA fragments. The adapter dimers and hairpin dimers were both  
438 removed using magnetic bead in PacBio's MagBead kit. Exonucleases were further used to  
439 remove the failed ligation DNA fragments. The purified library was sequenced by binding the  
440 sequencing polymerase in the SMRT sequencing cells and generated long subreads with a  
441 length distribution (**Fig. S13**).

442

#### 443 *Hi-C Sequencing*

444 To construct Hi-C library, the frozen foot tissue of *G. aegis* was thawed slowly on ice and  
445 suspended in 45 mL of 37% formaldehyde in serum-free Dulbecco's modified Eagle's medium  
446 (DMEM) for chromatin cross-linking. After incubation at room temperature for 5 minutes,  
447 glycine was added to quench the formaldehyde, followed by incubation at room temperature  
448 for another 5 minutes and subsequently on ice for over 15 minutes. The cells were further lysed  
449 in pre-chilled lysis buffer (10 mM NaCl, 0.2% IGEPAL CA-630, 10 mM Tris-HCl, and 1×  
450 protease inhibitor solution) using a Dounce homogenizer. The chromatin was digested by Mbo  
451 I restriction enzyme, marked with biotin and ligated<sup>34</sup>. The Hi-C library was sequenced on a  
452 NovaSeq 6000 platform (Illumina, USA) and generated reads with a length of 150 bp. The  
453 genome sequencing strategy of the host was summarised in **Table S14**.

454

#### 455 *RNA Extraction, Metatranscriptome Sequencing, and Eukaryotic Transcriptome Sequencing*

456 The total RNA of oesophageal glands dissected from three individuals of *Gigantopelta aegis*  
457 were separately extracted using the TRIzol reagent (Invitrogen, Carlsbad, CA, USA). The  
458 quality and quantity of RNA were checked by agarose gel electrophoresis and BioDrop µLITE  
459 (BioDrop, Cambridge, UK), respectively. To enrich the mRNA of endosymbionts, the rRNA  
460 of both eukaryote and bacteria were removed by both the Ribo-Zero<sup>TM</sup> Magnetic Kit  
461 (Human/Mouse/Rat) (Epicenter, USA) and the Ribo-Zero<sup>TM</sup> Magnetic Kit (Bacteria)  
462 (Epicenter, USA) following the manufacturers' protocols. The remaining RNA was used to  
463 construct cDNA libraries for metatranscriptome sequencing. The sequencing data are shown  
464 in **Table S15**.

465

466 Four *G. aegis* individuals were dissected to obtain different organs (foot, mantle, ctenidium,  
467 oesophageal gland, etc) for eukaryotic transcriptome sequencing (**Table S15**). Total RNA of  
468 these samples were separately extracted using TRIzol reagent (Invitrogen, Carlsbad, CA, USA)  
469 following the manufacturers' protocol. mRNA from each host tissue was enriched by Oligo-  
470 dT probes and further transferred to cDNA for eukaryotic library construction. All cDNA  
471 libraries were sequenced in a NovaSeq 6000 Illumina platform to generate paired-end reads  
472 with a length of 150 bp.

473

#### 474 *Hologenome Assembly and Scaffolding*

475 Adaptors and low-quality bases of raw Illumina sequencing reads were trimmed using  
476 Trimmomatic version 0.36<sup>35</sup> with the settings "ILLUMINACLIP: Truseq3-PE-2.fa". To obtain  
477 the genome of symbionts, clean Illumina reads from the oesophageal gland were used for initial  
478 assembly in metaSPAdes<sup>36</sup> with a series of kmers of 51, 61, 71, 81, and 91 bp. Illumina short  
479 reads belonging to the symbionts were grouped by genome binning according to both the  
480 sequencing coverage and the GC content of the initial contigs<sup>5</sup>. The grouped Illumina short  
481 reads and all ONT sequencing reads were reassembled together by Unicycler version 0.4.7<sup>37</sup>.  
482 The assembled contigs were grouped again via genome binning. Each group of contigs were  
483 further used in genome scaffolding by SSPACE-LongRead version 1.1<sup>38</sup> with the ONT reads  
484 and mapped PacBio reads that are over 10 kb. CheckM version 1.0.13<sup>39</sup> was used to assess the  
485 completeness and the contamination of the assembled bacterial genomes.

486

487 Several assembly pipelines were used for assembly, and the best contig assembly result was  
488 generated by “Canu correction + wtdbg2” (**Table S16**). PacBio subreads over 4 kb were  
489 corrected by Canu version 1.7.1<sup>40</sup> with settings of “genomeSize = 1.27 Gb, corMhapSensitivity  
490 = normal, corMinCoverage = 0, corMaxEvidenceErate = 0.15, correctedErrorRate = 0.065,  
491 minReadLength = 8000” and then used in genome assembly using wtdbg2 version 2.1<sup>41</sup> with  
492 settings of “-e 2 --tidy-reads 5000 -S 1 -k 15 -p 0 --rescue-low-cov-edges --aln-noskip”. To  
493 improve the accuracy of the initially assembled contigs, two polishing rounds using Racon  
494 version 1.3.1<sup>42</sup> were performed and followed by an additional round using Pilon version 1.22<sup>43</sup>  
495 with Illumina short reads that were mapped by Bowtie2 version 2.3.5<sup>44</sup> in the “--sensitive”  
496 mode. Bacterial contamination was further filtered using MaxBin version 2.2.5<sup>45</sup>.

497  
498 Raw Hi-C sequencing reads were first trimmed by Trimmomatic version 0.36<sup>35</sup>. To remove the  
499 invalid pairs of Hi-C reads without effective ligation, the reads were mapped to the corrected  
500 assembled contigs using Bowtie2 version 2.3.5<sup>44</sup>, and Hi-C contact maps were generated based  
501 on the mapped reads using HiC-Pro<sup>46</sup>. Juicer version 1.5<sup>47</sup> was used to filter and deduplicate.  
502 The remaining valid reads were used for contig scaffolding using the 3D *de novo* assembly  
503 (3D-DNA) pipeline<sup>48</sup> in diploid mode. The scaffolds were manually corrected based on the Hi-  
504 C contact maps (**Fig. S14**). The continuity and completeness of the assembled genome were  
505 evaluated with `assemblathon_stats.pl` ([https://github.com/ucdavis-](https://github.com/ucdavis-bioinformatics/assemblathon2-analysis/blob/master/assemblathon_stats.pl)  
506 [bioinformatics/assemblathon2-analysis/blob/master/assemblathon\\_stats.pl](https://github.com/ucdavis-bioinformatics/assemblathon2-analysis/blob/master/assemblathon_stats.pl)) and BUSCO  
507 version 3.0.2<sup>49</sup> using the “metazoa\_odb9” database, respectively.

508

#### 509 *Genes Prediction and Functional Annotation*

510 The coding sequences and proteins of symbionts genomes were predicted by Prodigal version  
511 2.6.3<sup>50</sup> with default settings. The host genome was first hard-masked in the repetitive regions  
512 and then trained with the boundary of the introns and exons in order to predict coding genes of  
513 *G. aegis* (for details see Supplementary Materials).

514

515 Repeats in the *Gigantopelta aegis* genome were *de novo* identified and classified using  
516 RepeatModeler version 1.0.11 (<http://www.repeatmasker.org/RepeatModeler/>) pipeline and  
517 soft-masked using RepeatMasker version 4.0.8  
518 (<http://www.repeatmasker.org/RMDownload.html>) with the parameter “-xsmall” (for details  
519 see Supplementary Materials).

520

521 To predict the gene models, we run two rounds of the MAKER pipeline version 2.31.10<sup>51</sup> on  
522 the soft-masked genome. To guide the prediction, we used *de novo* assembled transcripts,  
523 Metazoan protein sequences downloaded from the Swiss-Prot database, as well as protein  
524 sequences of *Chrysomallon squamiferum*<sup>17</sup> (for details see the Supplementary Materials).

525

526 The predicted protein sequences were searched against NCBI Non-Redundant (NR) database  
527 using BLASTp with an *E*-value cutoff of 1e-5. The sequences were also used to search the  
528 Kyoto Encyclopedia of Genes and Genomes (KEGG) database via KEGG Automatic  
529 Annotation Server (KAAS) using bi-directional best hit methods of BLASTp<sup>52</sup>. The protein  
530 sequences of the host were further searched against the EuKaryotic Orthologous Groups (KOG)

531 database. The protein sequences of symbionts were annotated against the functional Clusters  
532 of Orthologous Groups (COG) using eggNOG-mapper v2<sup>53</sup>. Pfam database<sup>54</sup> with hmmscan  
533 (<http://hmmer.org/>) was used to identify the functional domains of proteins.

534

#### 535 *Gene Family and Phylogenomic analysis*

536 To perform gene family analysis of *G. aegis*, Orthofinder version 2.3.3<sup>55</sup> was used to identify  
537 the orthologous groups shared between proteins of *G. aegis* and those of other molluscan  
538 genomes (see Supplementary Materials). Only single-copy orthologs were used to construct  
539 the phylogenetic tree. The protein sequences of each gene were aligned separately using  
540 MAFFT v7.407<sup>56</sup> and were concatenated for phylogenetic analysis using FastTree version  
541 2.1.10<sup>57</sup> with partitions. The software MCMCtree<sup>58</sup> was used to yield the time-calibrated tree  
542 by calibrating the phylogenetic tree with seven fossil records and geographic events (see  
543 Supplementary Materials).

544

545 Both CAFE 3<sup>59</sup> and Fisher's Exact Test were used for gene family analysis. The time-calibrated  
546 tree and gene family numbers shared by these species were used for gene family analysis in  
547 CAFE 3<sup>59</sup>. The Fisher's Exact Test was also used for gene family analysis based on the gene  
548 family numbers of *G. aegis* and the average gene family numbers of other species included.  
549 Only the gene families with a FDR corrected *P*-value smaller than 0.05 were considered as  
550 expanded or contracted.

551

552 To explore the phylogenetic relationship of the symbionts, 30 genomes of bacterial symbionts  
553 belonging to Gammaproteobacteria from deep-sea invertebrate taxa were included (details of  
554 referred symbionts see **Table S17**). Same pipelines of orthologs cluster and sequence  
555 alignments of *G. aegis* were applied in the symbionts analyses. The IQ-TREE multicore  
556 version 1.6.10<sup>60</sup> with LG+I+G4+F were used to perform the phylogeny analysis of the  
557 symbionts with 1000 ultrafast bootstraps.

558

#### 559 *Gene Expression Analysis of the Holobiont*

560 The coding DNA sequences of the predicted genes were used as references to assess gene  
561 expression levels. Kallisto version 0.45.1<sup>61</sup> was used to calculate transcripts per million (TPM)  
562 value according to the mapped reads count for each gene. In symbionts, the TPM values were  
563 directly used for gene expression level comparison. For the host, the highly expressed genes in  
564 the oesophageal gland were identified by differential expression analysis versus foot, ctenidium,  
565 and mantle ( $n = 4$ ) in edgeR<sup>62</sup>. If genes had a fold change larger than two and a significant FDR  
566 *P*-value ( $< 0.05$ ), they were designated as highly expressed genes. To compare the genes  
567 expression of *G. aegis* and *C. squamiferum*, the same analysis pipeline was applied to the  
568 transcriptome sequencing data of foot tissue, ctenidium, mantle, and oesophageal gland from  
569 the *C. squamiferum*<sup>17</sup>.

570

#### 571 *Synteny Analysis*

572 Proteins of *G. aegis* and *C. squamiferum* were searched against each other via BLASTp with  
573 an *E*-value cutoff of 1e-5. The hits were used to detect collinear blocks and synteny shared

574 between these two deep-sea gastropods by MCSanX<sup>63</sup>. JCVI  
575 (<https://github.com/tanghaibao/jcvi>) was utilised to generate the chromosome-scale synteny  
576 plot.

577

### 578 *Metaproteomics*

579 The oesophageal glands from three *Gigantopelta aegis* individuals were used for protein  
580 extraction using the methanol-chloroform method<sup>64</sup>. SDS-PAGE gel was used to separate  
581 different size (ranging from 10 kDa to 150 kDa) of ~30 µg extracted protein from each sample  
582 and stained by colloidal coomassie blue. The peptide for LC-MS/MS was obtained through  
583 protein reduction, alkylation and digestion, peptide extraction and further dry. Dionex UltiMate  
584 3000 RSLCnano coupled with an Orbitrap Fusion Lumos Mass Spectrometer (Thermo Fisher)  
585 was utilised to analyse each protein fraction. The search database contains the protein  
586 sequences predicted from the genome and the corresponding reversed sequences (decoy) of  
587 both *Gigantopelta aegis* and its two endosymbionts. Mascot version 2.3.0 was used to identify  
588 and quantify the protein via the raw mass spectrometry data. Proteins were identified with the  
589 assigned peptides' identification confidence level over 0.95 and a false discovery rate of less  
590 than 2.5% (see Supplementary Materials).

591

### 592 **Acknowledgements**

593 We thank captain and crew of the R/V *Xiangyanghong 9* and pilots of HOV *Jiaolong* for their  
594 great support during the research cruise DY35th-II, and captain and crew of the R/V *Dayang*  
595 *Yihao* as well as the operation team of the ROV *Sea Dragon* III during the third leg of the  
596 China Ocean Mineral Resources Research and Development Association DY52nd cruise. Dr.  
597 Jack C.H. Ip and Dr. Ting Xu from the Hong Kong Baptist University are gratefully  
598 acknowledged for their helpful comments. This work was supported by grants from China  
599 Ocean Mineral Resources Research and Development Association (DY135-E2-1-03), the  
600 Hong Kong Branch of Southern Marine Science and Engineering Guangdong Laboratory  
601 (Guangzhou) (SMSEGL20SC01), Southern Marine Science and Engineering Guangdong  
602 Laboratory (Guangzhou) (GML2019ZD0409), and Major Project of Basic and Applied Basic  
603 Research of Guangdong Province (2019B030302004-04) awarded to P-YQ.

604

### 605 **Data Availability**

606 All sequencing data, assembly data, predicted genes, and proteins of *Gigantopelta aegis* and  
607 its two symbionts were submitted to the database of National Centre for Biotechnology  
608 Information under BioProject PRJNA612619.

609

### 610 **Author Contributions**

611 P-YQ conceived the project. YL, JS, CC, and P-YQ designed the experiments. YZ, JS, and YS  
612 collected the samples of *Gigantopelta aegis* gastropods. CC, JS, YL, and YY dissected the  
613 *Gigantopelta aegis* samples. CC performed TEM experiments. YL, JS, AC, and WZ  
614 contributed to the FISH experiments. YL, SB, RL, and JS performed host genome assembly.  
615 YL and YS performed the gene prediction of *G. aegis*. RL drew Circos plots of the hologenome.  
616 YL and JS contributed to phylogenomic analysis and calibration of the molecular clock of the  
617 host. YL, KZ, YY, and WZ contributed to the symbiont genome assembly. WCW, YHK, JS,

618 and YL performed the proteome analysis. YL performed the DNA extraction, RNA extraction,  
619 ONT sequencing, gene expression analysis, gene family analysis, synteny analysis, immune  
620 response analysis, and drafted the manuscript. J-WQ and CVD contributed to manuscript  
621 editing. All authors contributed to the manuscript and approved it for submission and  
622 publication.

623

## 624 **Competing interests**

625 The authors declare no competing interests.

626

## 627 **References**

- 628 1. Robbins, S. J. et al. A genomic view of the reef-building coral *Porites lutea* and its  
629 microbial symbionts. *Nat. Microbiol.* **4**, 2090–2100 (2019).
- 630 2. Dubilier, N., Bergin, C. & Lott, C. Symbiotic diversity in marine animals: the art of  
631 harnessing chemosynthesis. *Nat. Rev. Microbiol.* **6**, 725–740 (2008).
- 632 3. Nakagawa, S. et al. Allying with armored snails: the complete genome of  
633 gammaproteobacterial endosymbiont. *ISME J.* **8**, 40–51 (2014).
- 634 4. Newton, I. L. G. et al. The *Calyptogena magnifica* chemoautotrophic symbiont  
635 genome. *Science* **315**, 998–1000 (2007).
- 636 5. Yang, Y. et al. Genomic, transcriptomic, and proteomic insights into the symbiosis of deep-  
637 sea tubeworm holobionts. *ISME J.* **14**, 135–150 (2019).
- 638 6. Lan, Y. et al. Host-symbiont interactions in deep-sea chemosymbiotic vesicomid clams:  
639 insights from transcriptome sequencing. *Front. Mar. Sci.* **6**, 680 (2019).
- 640 7. Fujiwara, Y., Kato, C., Masui, N., Fujikura, K. & Kojima, S. Dual symbiosis in the cold-  
641 seep thyasirid clam *Maorithyas hadalis* from the hadal zone in the Japan Trench, western  
642 Pacific. *Mar. Ecol. Prog. Ser.* **214**, 151–159 (2001).
- 643 8. Beinart, R. A., Luo, C., Konstantinidis, K., Stewart, F. & Girguis, P. R. The bacterial  
644 symbionts of closely related hydrothermal vent snails with distinct geochemical habitats  
645 show broad similarity in chemoautotrophic gene content. *Front. Microbiol.* **10**, 1818  
646 (2019).
- 647 9. Ansoerge, R. et al. Functional diversity enables multiple symbiont strains to coexist in deep-  
648 sea mussels. *Nat. Microbiol.* **4**, 2487–2497 (2019).
- 649 10. Geier, B. et al. Spatial metabolomics of in situ host–microbe interactions at the micrometre  
650 scale. *Nat. Microbiol.* **5**, 498–510 (2020).
- 651 11. Sun, J. et al. Adaptation to deep-sea chemosynthetic environments as revealed by mussel  
652 genomes. *Nat. Ecol. Evol.* **1**, 121 (2017).
- 653 12. Won, Y. J. et al. Environmental acquisition of thiotrophic endosymbionts by deep-sea  
654 mussels of the genus *Bathymodiolus*. *Appl. Environ. Microbiol.* **69**, 6785–6792 (2003).
- 655 13. Goffredi, S. K., Warén, A., Orphan, V. J., Van Dover, C. L. & Vrijenhoek, R. C. Novel  
656 forms of structural integration between microbes and a hydrothermal vent gastropod from  
657 the Indian Ocean. *Appl. Environ. Microbiol.* **70**, 3082–3090 (2004).
- 658 14. Chen, C., Linse, K., Copley, J. T. & Rogers, A. D. The ‘scaly-foot gastropod’: a new genus  
659 and species of hydrothermal vent-endemic gastropod (Neomphalina: Peltospiridae) from  
660 the Indian Ocean. *J. Molluscan Stud.* **81**, 322–334 (2015).
- 661 15. Chen, C., Uematsu, K., Linse, K. & Sigwart, J. D. By more ways than one: rapid



- 662 convergence at hydrothermal vents shown by 3D anatomical reconstruction of  
663 *Gigantopelta* (Mollusca: Neomphalina). *BMC Evol. Biol.* **17**, 62 (2017).
- 664 16. Chen, C., Linse, K., Uematsu, K. & Sigwart, J. D. Cryptic niche switching in a  
665 chemosymbiotic gastropod. *Proc. Biol. Sci.* **285**, 20181099 (2018).
- 666 17. Sun, J. et al. The scaly-foot snail genome and the ancient origins of biomineralised armour.  
667 *Nat. Commun.* **11**, 1657 (2020).
- 668 18. Heywood, J. L., Chen, C., Pearce, D. A. & Linse, K. Bacterial communities associated with  
669 the Southern Ocean vent gastropod, *Gigantopelta chessoia*: indication of horizontal  
670 symbiont transfer. *Polar Biol.* **40**, 2335–2342 (2017).
- 671 19. Sun, J. et al. Signatures of divergence, invasiveness, and terrestrialization revealed by four  
672 apple snail genomes. *Mol. Biol. Evol.* **36**, 1507–1520 (2019).
- 673 20. Salerno, J. L. et al. Characterization of symbiont populations in life-history stages of  
674 mussels from chemosynthetic environments. *Biol. Bull.* **208**, 145–155 (2005).
- 675 21. Duperron, S. et al. Diversity, relative abundance and metabolic potential of bacterial  
676 endosymbionts in three *Bathymodiolus* mussel species from cold seeps in the Gulf of  
677 Mexico. *Environ. Microbiol.* **9**, 1423–1438 (2007).
- 678 22. Wippler, J. et al. Transcriptomic and proteomic insights into innate immunity and  
679 adaptations to a symbiotic lifestyle in the gutless marine worm *Olavius algarvensis*. *BMC*  
680 *Genomics* **17**, 942 (2016).
- 681 23. Beinart, R. A. et al. Evidence for the role of endosymbionts in regional-scale habitat  
682 partitioning by hydrothermal vent symbioses. *Proc. Natl. Acad. Sci. USA* **109**, E3241–  
683 E3250 (2012).
- 684 24. Jeannin, P. et al. Complexity and complementarity of outer membrane protein A recognition  
685 by cellular and humoral innate immunity receptors. *Immunity* **22**, 551–560 (2005).
- 686 25. Kawagucci, S. et al. Fluid chemistry in the Solitaire and Dodo hydrothermal fields of the  
687 Central Indian Ridge. *Geofluids* **16**, 988–1005 (2016).
- 688 26. Ji, F. et al. Geochemistry of hydrothermal vent fluids and its implications for subsurface  
689 processes at the active Longqi hydrothermal field, Southwest Indian Ridge. *Deep-Sea Res.*  
690 *PT. I* **122**, 41–47 (2017).
- 691 27. Tao, C. et al. Deep high-temperature hydrothermal circulation in a detachment faulting  
692 system on the ultra-slow spreading ridge. *Nat. Commun.* **11**, 1300 (2020).
- 693 28. Ponnudurai, R. et al. Metabolic and physiological interdependencies in the *Bathymodiolus*  
694 *azoricus* symbiosis. *ISME J.* **11**, 463–477 (2017).
- 695 29. Fisher, C. R., Kennicutt, M. C. & Brooks, J. M. Stable carbon isotopic evidence for carbon  
696 limitation in hydrothermal vent vestimentiferans. *Science* **247**, 1094–1096 (1990).
- 697 30. Rubin-Blum, M. et al. Fueled by methane: deep-sea sponges from asphalt seeps gain their  
698 nutrition from methane-oxidising symbionts. *ISME J.* **13**, 1209 (2019).
- 699 31. Price, D. R. & Wilson, A. C. A substrate ambiguous enzyme facilitates genome reduction  
700 in an intracellular symbiont. *BMC Biol.* **12**, 110 (2014)
- 701 32. Kleiner, M., Young, J. C., Shah, M., VerBerkmoes, N. C. & Dubilier, N. Metaproteomics  
702 reveals abundant transposase expression in mutualistic endosymbionts. *mBio* **4**, e00223-13  
703 (2013).
- 704 33. Wick, R. R., Judd, L. M. & Holt, K. E. Performance of neural network basecalling tools for  
705 Oxford Nanopore sequencing. *Genome Biol.* **20**, 129 (2019).

- 706 34. Lieberman-Aiden, E. et al. Comprehensive mapping of long-range interactions reveals  
707 folding principles of the human genome. *Science* **326**, 289–293 (2009).
- 708 35. Bolger, A. M., Lohse, M. & Usadel, B. Trimmomatic: a flexible trimmer for Illumina  
709 sequence data. *Bioinformatics* **30**, 2114–2120 (2014).
- 710 36. Nurk, S., Meleshko, D., Korobeynikov, A. & Pevzner, P. A. metaSPAdes: a new versatile  
711 metagenomic assembler. *Genome Res.* **27**, 824–834 (2017).
- 712 37. Wick, R. R., Judd, L. M., Gorrie, C. L. & Holt, K. E. Unicycler: resolving bacterial genome  
713 assemblies from short and long sequencing reads. *PLoS Comput. Biol.* **13**, e1005595  
714 (2017).
- 715 38. Boetzer, M. & Pirovano, W. SSPACE-LongRead: scaffolding bacterial draft genomes  
716 using long read sequence information. *BMC Bioinformatics* **15**, 211 (2014).
- 717 39. Parks, D. H., Imelfort, M., Skennerton, C. T., Hugenholtz, P. & Tyson, G. W. CheckM:  
718 assessing the quality of microbial genomes recovered from isolates, single cells, and  
719 metagenomes. *Genome Res.* **25**, 1043–1055 (2015).
- 720 40. Koren, S. et al. Canu: scalable and accurate long-read assembly via adaptive k-mer  
721 weighting and repeat separation. *Genome Res.* **27**, 722–736 (2017).
- 722 41. Ruan, J. & Li, H. Fast and accurate long-read assembly with wtdbg2. *Nat. Methods* **17**,  
723 155–158 (2019).
- 724 42. Vaser, R., Sović, I., Nagarajan, N. & Šikić, M. Fast and accurate *de novo* genome assembly  
725 from long uncorrected reads. *Genome Res.* **27**, 737–746 (2017).
- 726 43. Walker, B. J. et al. Pilon: an integrated tool for comprehensive microbial variant detection  
727 and genome assembly improvement. *PloS ONE* **9**, e112963 (2014).
- 728 44. Langmead, B. & Salzberg, S. L. Fast gapped-read alignment with Bowtie 2. *Nat. Methods*  
729 **9**, 357–359 (2012).
- 730 45. Wu, Y. W., Simmons, B. A. & Singer, S. W. MaxBin 2.0: an automated binning algorithm  
731 to recover genomes from multiple metagenomic datasets. *Bioinformatics* **32**, 605–607  
732 (2015).
- 733 46. Servant, N. et al. HiC-Pro: An optimized and flexible pipeline for Hi-C processing. *Genome*  
734 *Biol.* **16**, 259 (2015).
- 735 47. Durand, N. C. et al. Juicer provides a one-click system for analyzing loop-resolution Hi-C  
736 experiments. *Cell Syst.* **3**, 95–98 (2016).
- 737 48. Dudchenko, O. et al. *De novo* assembly of the *Aedes aegypti* genome using Hi-C yields  
738 chromosome-length scaffolds. *Science* **356**, 92–95 (2017).
- 739 49. Simão, F. A., Waterhouse, R. M., Ioannidis, P., Kriventseva, E. V. & Zdobnov, E. M.  
740 BUSCO: assessing genome assembly and annotation completeness with single-copy  
741 orthologs. *Bioinformatics* **31**, 3210–3212 (2015).
- 742 50. Hyatt, D. et al. Prodigal: prokaryotic gene recognition and translation initiation site  
743 identification. *BMC Bioinformatics* **11**, 119 (2010).
- 744 51. Cantarel, B. L. et al. MAKER: An easy-to-use annotation pipeline designed for emerging  
745 model organism genomes. *Genome Res.* **18**, 188–196 (2008).
- 746 52. Moriya, Y., Itoh, M., Okuda, S., Yoshizawa, A. C. & Kanehisa, M. KAAS: an automatic  
747 genome annotation and pathway reconstruction server. *Nucleic Acids Res.* **35**, W182–W185  
748 (2007).
- 749 53. Huerta-Cepas, J. et al. Fast genome-wide functional annotation through orthology

- 750 assignment by eggNOG-mapper. *Mol. Biol. Evol.* **34**, 2115–2122 (2017).
- 751 54. El-Gebali, S. et al. The Pfam protein families database in 2019. *Nucleic Acids Res.* **47**,  
752 D427–D432 (2019).
- 753 55. Emms, D. M. & Kelly, S. OrthoFinder: solving fundamental biases in whole genome  
754 comparisons dramatically improves orthogroup inference accuracy. *Genome Biol.* **16**, 157  
755 (2015).
- 756 56. Katoh, K., Kuma, K. I., Toh, H. & Miyata, T. MAFFT version 5: improvement in accuracy  
757 of multiple sequence alignment. *Nucleic Acids Res.* **33**, 511–518 (2005).
- 758 57. Price, M. N., Dehal, P. S. & Arkin, A. P. FastTree: computing large minimum-evolution  
759 trees with profiles instead of a distance matrix. *Mol. Biol. Evol.* **26**, 1641–1650 (2009)
- 760 58. dos Reis, M. & Yang, Z. Approximate likelihood calculation on a phylogeny for Bayesian  
761 estimation of divergence times. *Mol. Biol. Evol.* **28**, 2161–2172 (2011).
- 762 59. Han, M. V., Thomas, G. W., Lugo-Martinez, J. & Hahn, M. W. Estimating gene gain and  
763 loss rates in the presence of error in genome assembly and annotation using CAFE 3. *Mol.*  
764 *Biol. Evol.* **30**, 1987–1997 (2013).
- 765 60. Nguyen, L. T., Schmidt, H. A., Von Haeseler, A. & Minh, B. Q. IQ-TREE: a fast and  
766 effective stochastic algorithm for estimating maximum-likelihood phylogenies. *Mol. Biol.*  
767 *Evol.* **32**, 268–274 (2015).
- 768 61. Bray, N. L., Pimentel, H., Melsted, P. & Pachter, L. Near-optimal probabilistic RNA-seq  
769 quantification. *Nat. Biotechnol.* **34**, 525 (2016).
- 770 62. Robinson, M. D., McCarthy, D. J. & Smyth, G. K. edgeR: a Bioconductor package for  
771 differential expression analysis of digital gene expression data. *Bioinformatics* **26**, 139–  
772 140 (2010).
- 773 63. Wang, Y. et al. MCScanX: a toolkit for detection and evolutionary analysis of gene synteny  
774 and collinearity. *Nucleic Acids Res.* **40**, e49–e49 (2012).
- 775 64. Wessel, D. M. & Flügge, U. I. A method for the quantitative recovery of protein in dilute  
776 solution in the presence of detergents and lipids. *Anal Biochem.* **138**, 141–143 (1984).
- 777

778 **Tables**

779 **Table 1** Genome capabilities of *Gigantopelta aegis* and *Chrysomallon squamiferum*  
 780 holobionts<sup>3,17</sup> in the biosynthesis of different nutrients, including amino acids, cofactors and  
 781 vitamins (SOB: sulphur-oxidising endosymbiont, MOB: methane-oxidising endosymbiont).

| Nutrients                 | <i>Gigantopelta aegis</i> |     |      | <i>Chrysomallon squamiferum</i> |                    |
|---------------------------|---------------------------|-----|------|---------------------------------|--------------------|
|                           | SOB                       | MOB | Host | SOB <sup>3</sup>                | Host <sup>17</sup> |
| <b>Amino acid</b>         |                           |     |      |                                 |                    |
| Alanine                   | +                         | +   | +    | +                               | +                  |
| Glutamine                 | +                         | +   | +    | +                               | +                  |
| Glutamate                 | +                         | +   | +    | +                               | +                  |
| Serine                    | +                         | +   | +    | +                               | +                  |
| Glycine                   | +                         | +   | +    | +                               | +                  |
| Threonine                 | +                         | +   | +    | +                               | +                  |
| Cysteine                  | -                         | +   | +    | -                               | +                  |
| Methionine                | -                         | -   | +    | -                               | +                  |
| Isoleucine                | +                         | +   | -    | +                               | -                  |
| Valine                    | +                         | +   | -    | +                               | -                  |
| Leucine                   | +                         | +   | -    | +                               | -                  |
| Lysine                    | +                         | +   | -    | +                               | -                  |
| Arginine                  | +                         | +   | +    | +                               | +                  |
| Proline                   | +                         | +   | +    | +                               | +                  |
| Asparagine                | +                         | +   | +    | +                               | +                  |
| Aspartate                 | +                         | +   | +    | +                               | +                  |
| Histidine                 | +                         | +   | -    | +                               | -                  |
| Phenylalanine             | +                         | +   | -    | +                               | -                  |
| Tryptophan                | +                         | +   | -    | +                               | -                  |
| Tyrosine                  | -                         | -   | +    | -                               | +                  |
| <b>Cofactor / Vitamin</b> |                           |     |      |                                 |                    |
| Vitamin B1                | +                         | +   | -    | +                               | -                  |
| Vitamin B2                | +                         | +   | -    | +                               | -                  |
| Vitamin B3                | -                         | -   | +    | -                               | +                  |
| Vitamin B5                | -                         | +   | -    | -                               | -                  |
| Vitamin B6                | -                         | -   | +    | -                               | +                  |
| Vitamin B7                | +                         | +   | -    | +                               | -                  |
| Vitamin B9                | +                         | +   | -    | +                               | -                  |
| Vitamin B12               | +                         | +   | -    | +                               | -                  |
| Coenzyme A                | -                         | +   | -    | -                               | -                  |
| Ubiquinone                | +                         | +   | +    | +                               | +                  |
| Siroheme                  | +                         | +   | -    | +                               | -                  |

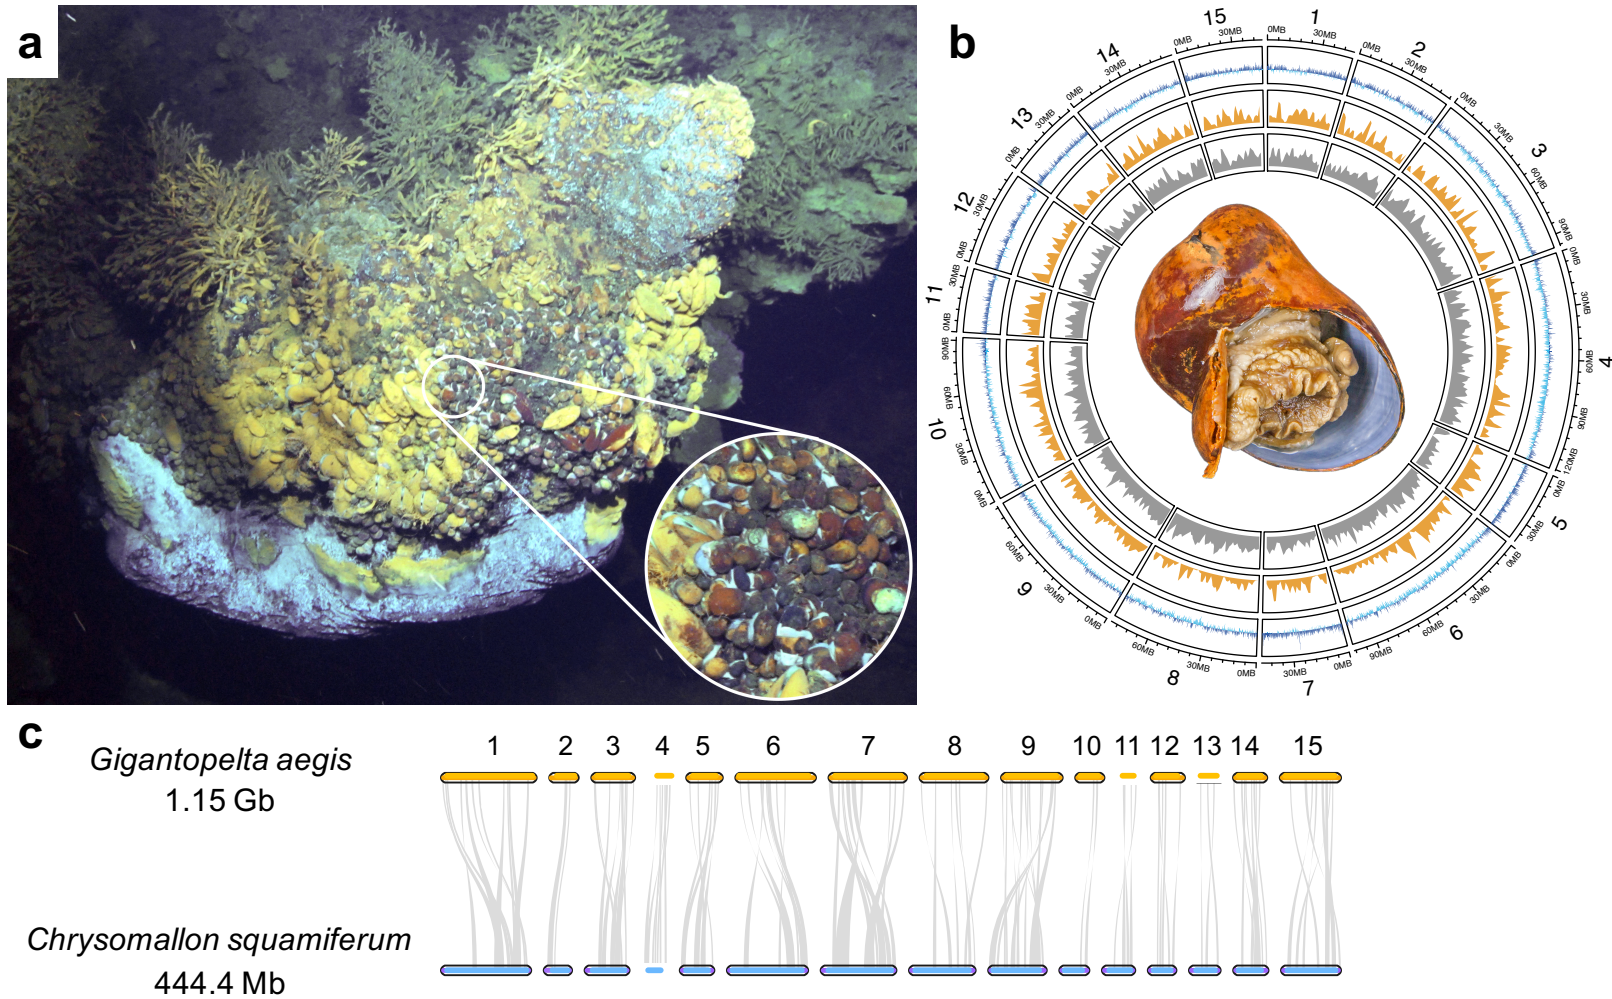

783  
 784 **Figure 1 a.** Two chemosymbiotic peltospirid snails, *Gigantopelta aegis* and the Scaly-foot Snail *Chrysomallon squamiferum*, occurring in great abundance  
 785 side-by-side at Tiamat chimney in the Longqi vent field on the ultra-slow spreading Southwest Indian Ridge (*G. aegis* in dark orange; *C. squamiferum* in  
 786 black). **b.** A circos plot shows key features of 15 pseudo-chromosomal linkage groups of the *Gigantopelta aegis* genome showing an adult snail at the centre,  
 787 the inner circle (gray) indicating the gene density of each pseudo-chromosome, the second circle (orange) indicating the gene density of highly expressed  
 788 genes in the oesophageal gland ( $n = 4$ ), and the outer circle (blue) showing the GC content of the deviation from the average 37.22%. A sliding window of  
 789 100 kb in a step of 50kb was applied in the calculation of the GC content. **c.** Synteny blocks shared between *G. aegis* (orange) and *C. squamiferum* (blue).  
 790 The pseudo-chromosome numbers of both *G. aegis* and *C. squamiferum* are 15. The synteny blocks are distributed in one-to-one correspondence among the  
 791 pseudo-chromosomes without cross-chromosomal synteny.

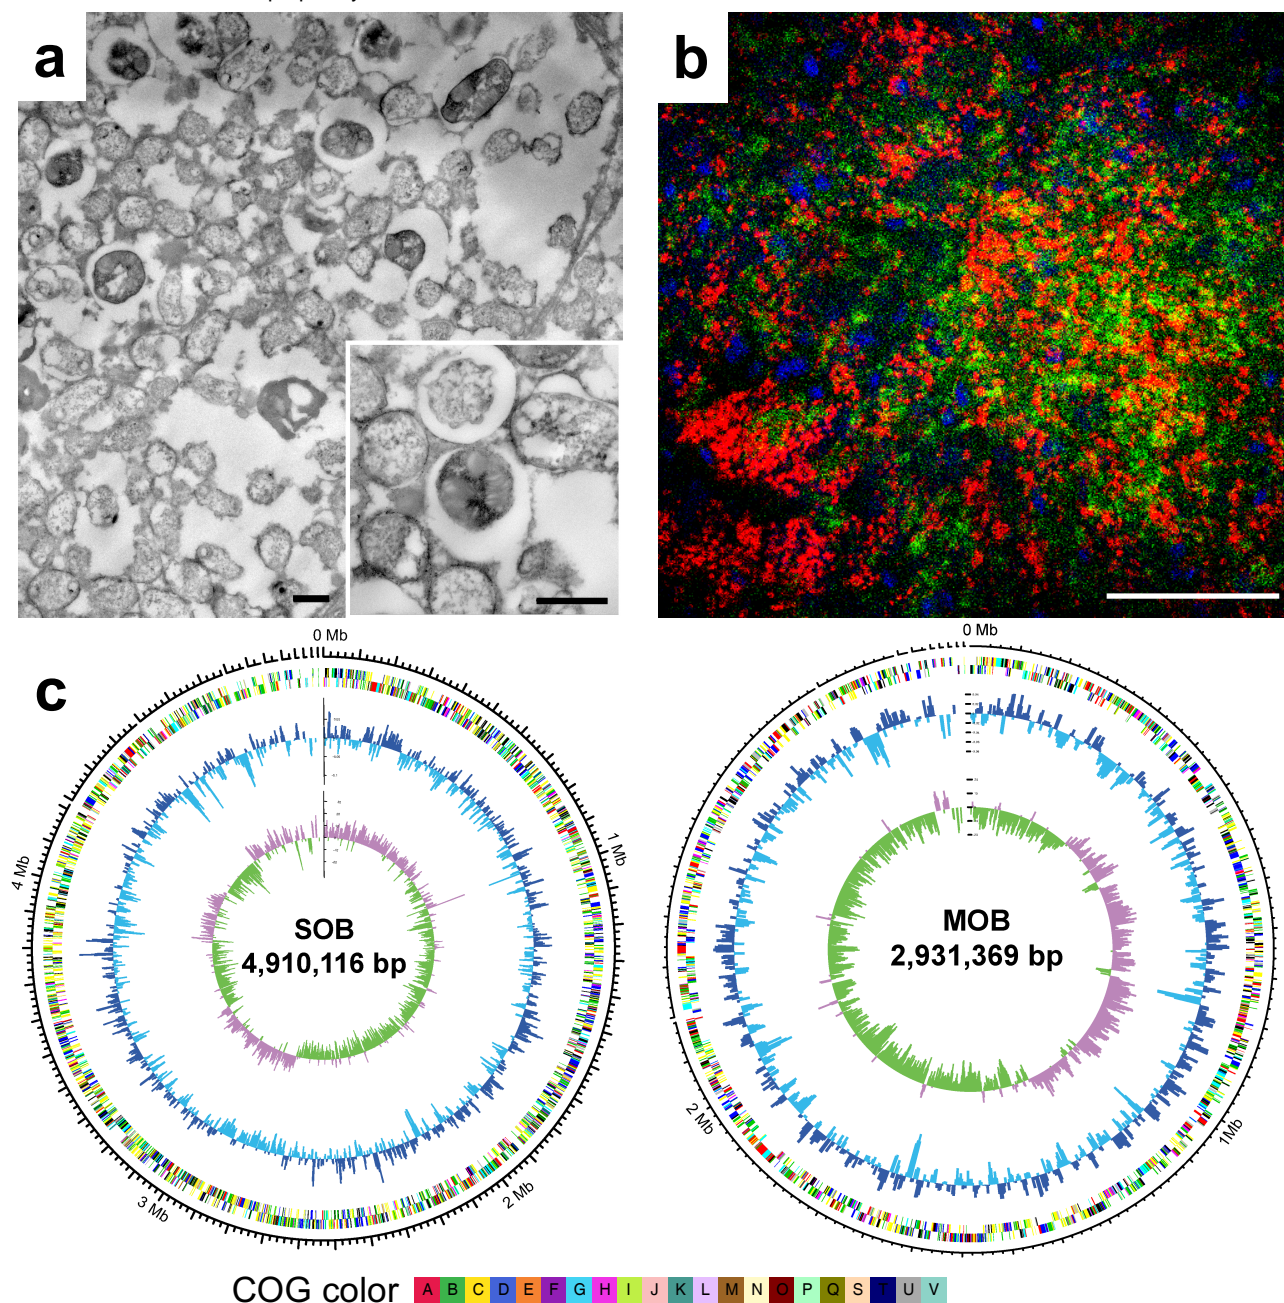

792

793 **Figure 2 a.** Transmission electron microscopy (TEM) images of intracellular endosymbionts showing  
 794 two distinct morphological types, including one endosymbiont with intracellular stacked membranes and  
 795 another without (scale bar: 1  $\mu$ m). **b.** Fluorescence *in situ* hybridisation (FISH) image yielding signals of  
 796 sulphur-oxidising endosymbionts (SOB; Cy3: green) and the methane-oxidising endosymbionts (MOB;  
 797 Cy5: red) on transverse sections of the oesophageal gland from *Gigantopelta aegis* (scale bar: 50  $\mu$ m).  
 798 Host nuclear DNA with DAPI staining is blue. More detailed TEM and FISH images are shown in Figure  
 799 S6. **c.** Key genome features of both the SOB and the MOB of *G. aegis* with the inner circle showing the  
 800 GC skew, the second circle showing the GC content of the deviation from the average (SOB: 39.93%;  
 801 MOB: 45.26%), and the outer circle showing the COG annotation categories with different colours. A  
 802 sliding window of 5 kb in a step of 2.5 kb was applied in the calculation of both the GC skew and the  
 803 GC content.  
 804

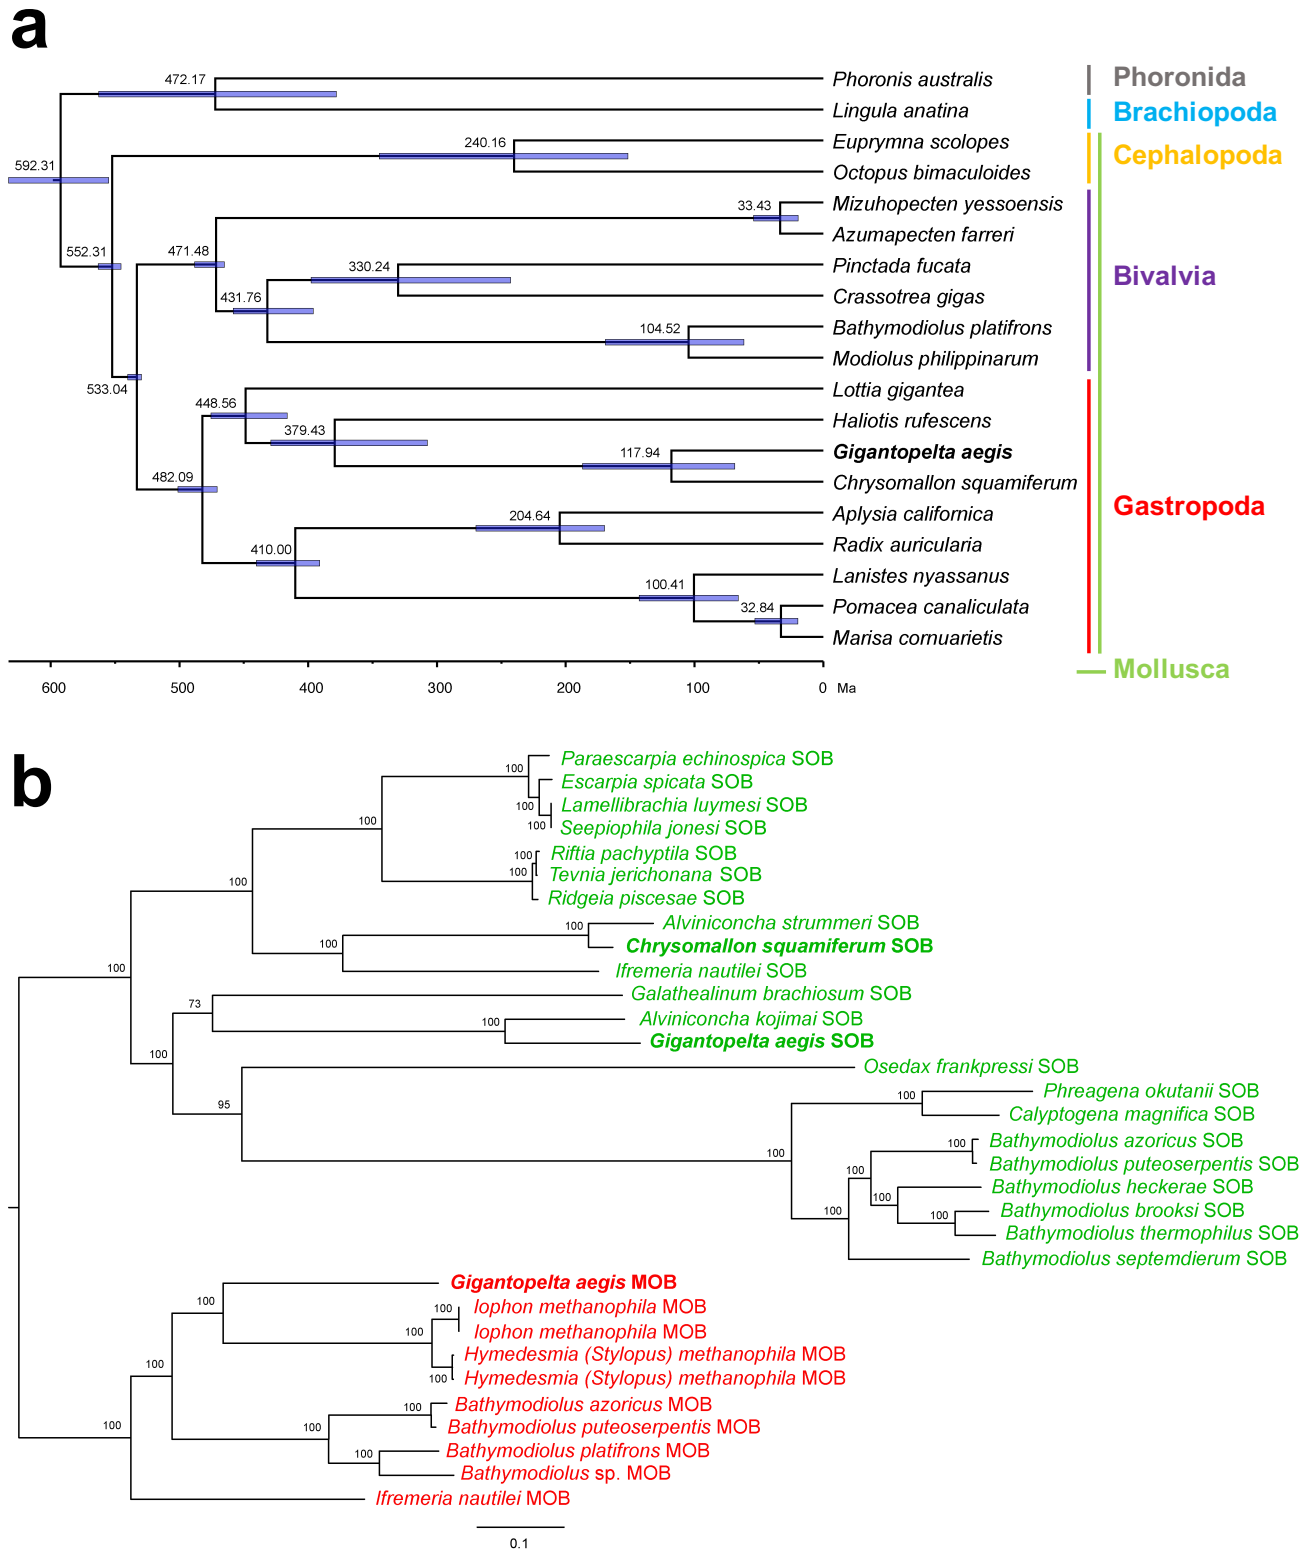

805

806

807

808

809

810

811

812

813

814

**Figure 3 a.** Time-calibrated phylogeny showing the estimated divergence time of 19 lophotrochozoan taxa, with a focus on 17 molluscs. *Phoronis australis* (Phoronida) and *Lingula anatina* (Brachiopoda) served as outgroups for the molluscs. A total of 1,066 single-copy orthologs were used. The purple horizontal lines indicate the 95% confidence intervals of the divergence times. For genome resources, fossil records and geographic events used in the time calibration see Supplementary Materials. **b.** Phylogenetic reconstruction of 32 symbionts in Gammaproteobacteria (See Supplementary Materials) from invertebrate taxa living in deep-sea chemosynthetic environments. A total of 424 single-copy orthologs were used to construct the tree. The phylogenetic tree includes two major lineages of the sulphur-oxidising bacteria (green) and the methane-oxidising bacteria (red).

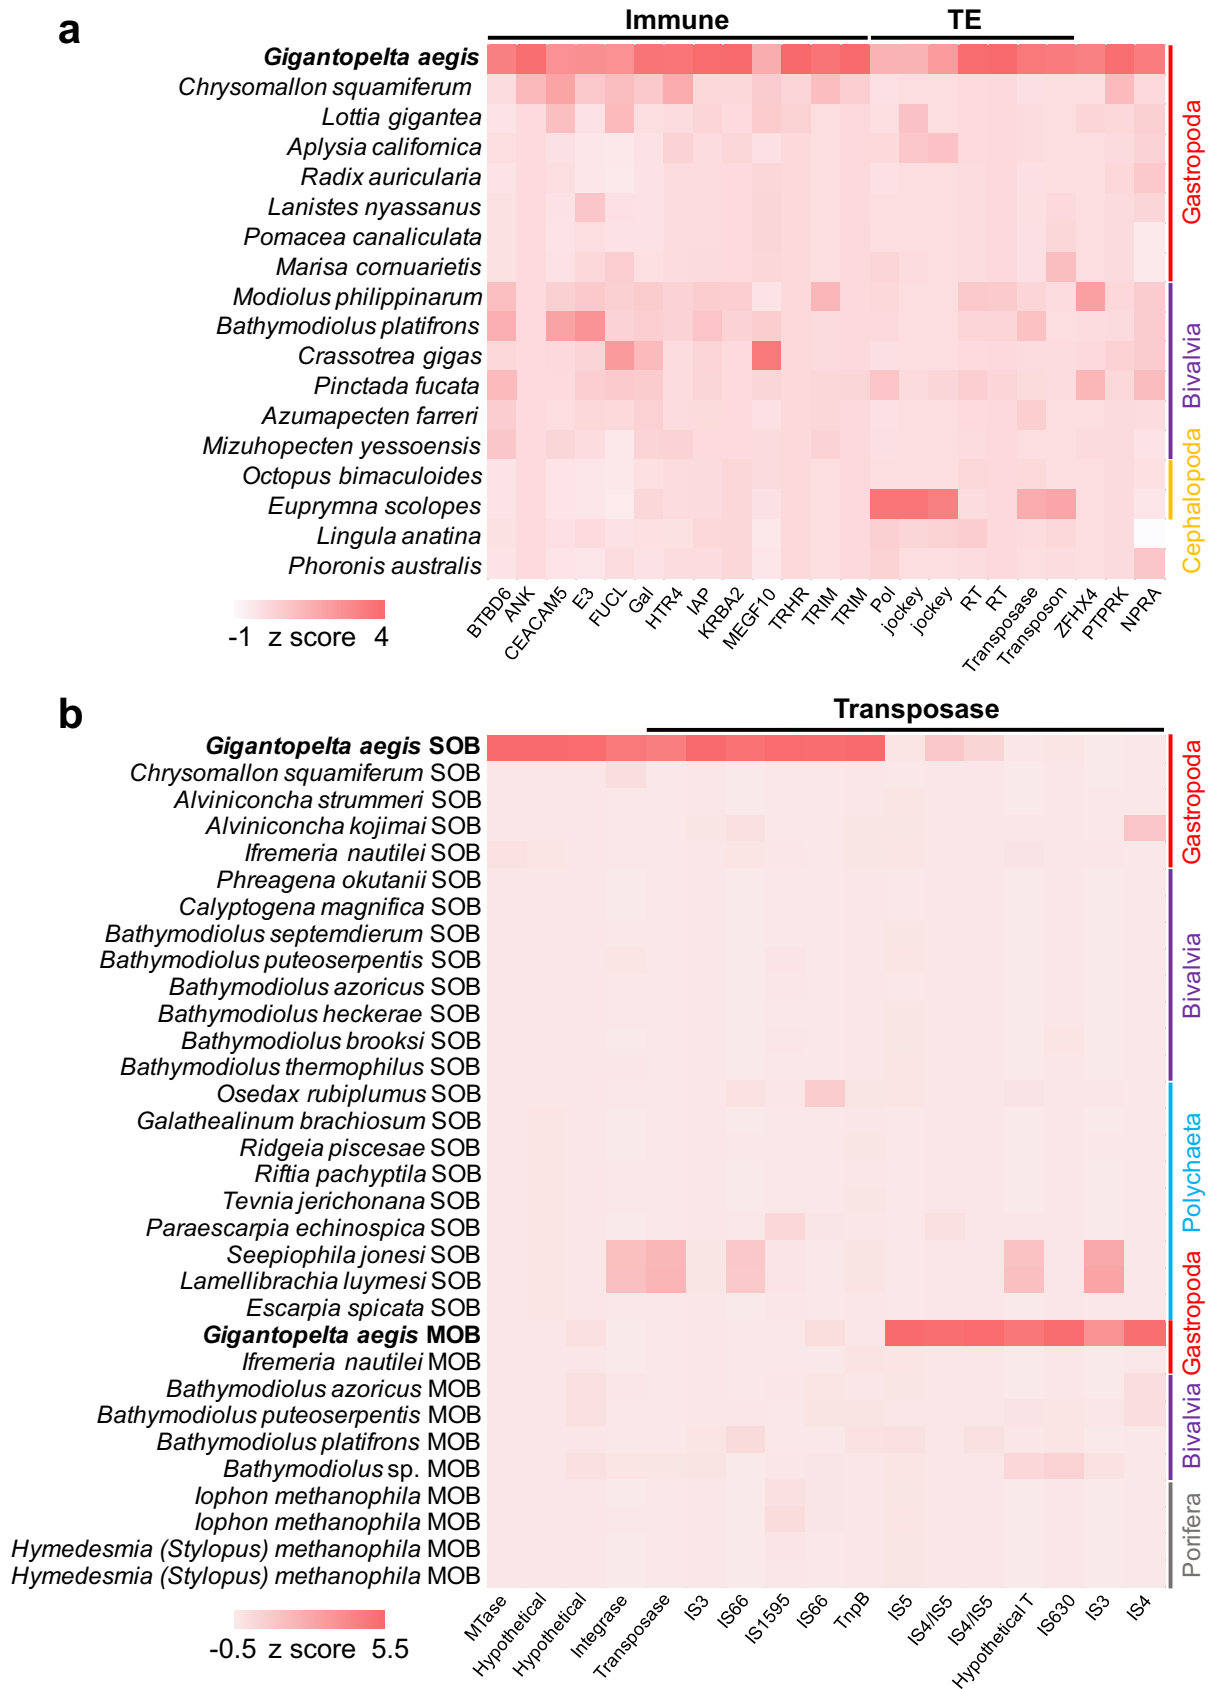

815

816 **Figure 4** Heat maps showing the expanded gene families in *Gigantopelta aegis* and its two  
 817 endosymbionts. **a.** Compared to other 15 molluscan taxa (systematic affinity at the class level shown on  
 818 the right side), *Phoronis australis* (Phoronida), and *Lingula anatina* (Brachiopoda) with available  
 819 genomes (used in the molecular clock analysis), the gene families expanded in *G. aegis* mainly include  
 820 immune-related gene families (Immune) and transposable elements (TEs). **b.** Both the sulphur-oxidising  
 821 endosymbionts and the methane-oxidising endosymbionts exhibit the transposases expansion.  
 822 References are 30 symbionts in Gammaproteobacteria (See Supplementary Materials) from invertebrate  
 823 taxa living in deep-sea chemosynthetic environments. The systematic affinity of the host taxa is shown  
 824 on the right side.



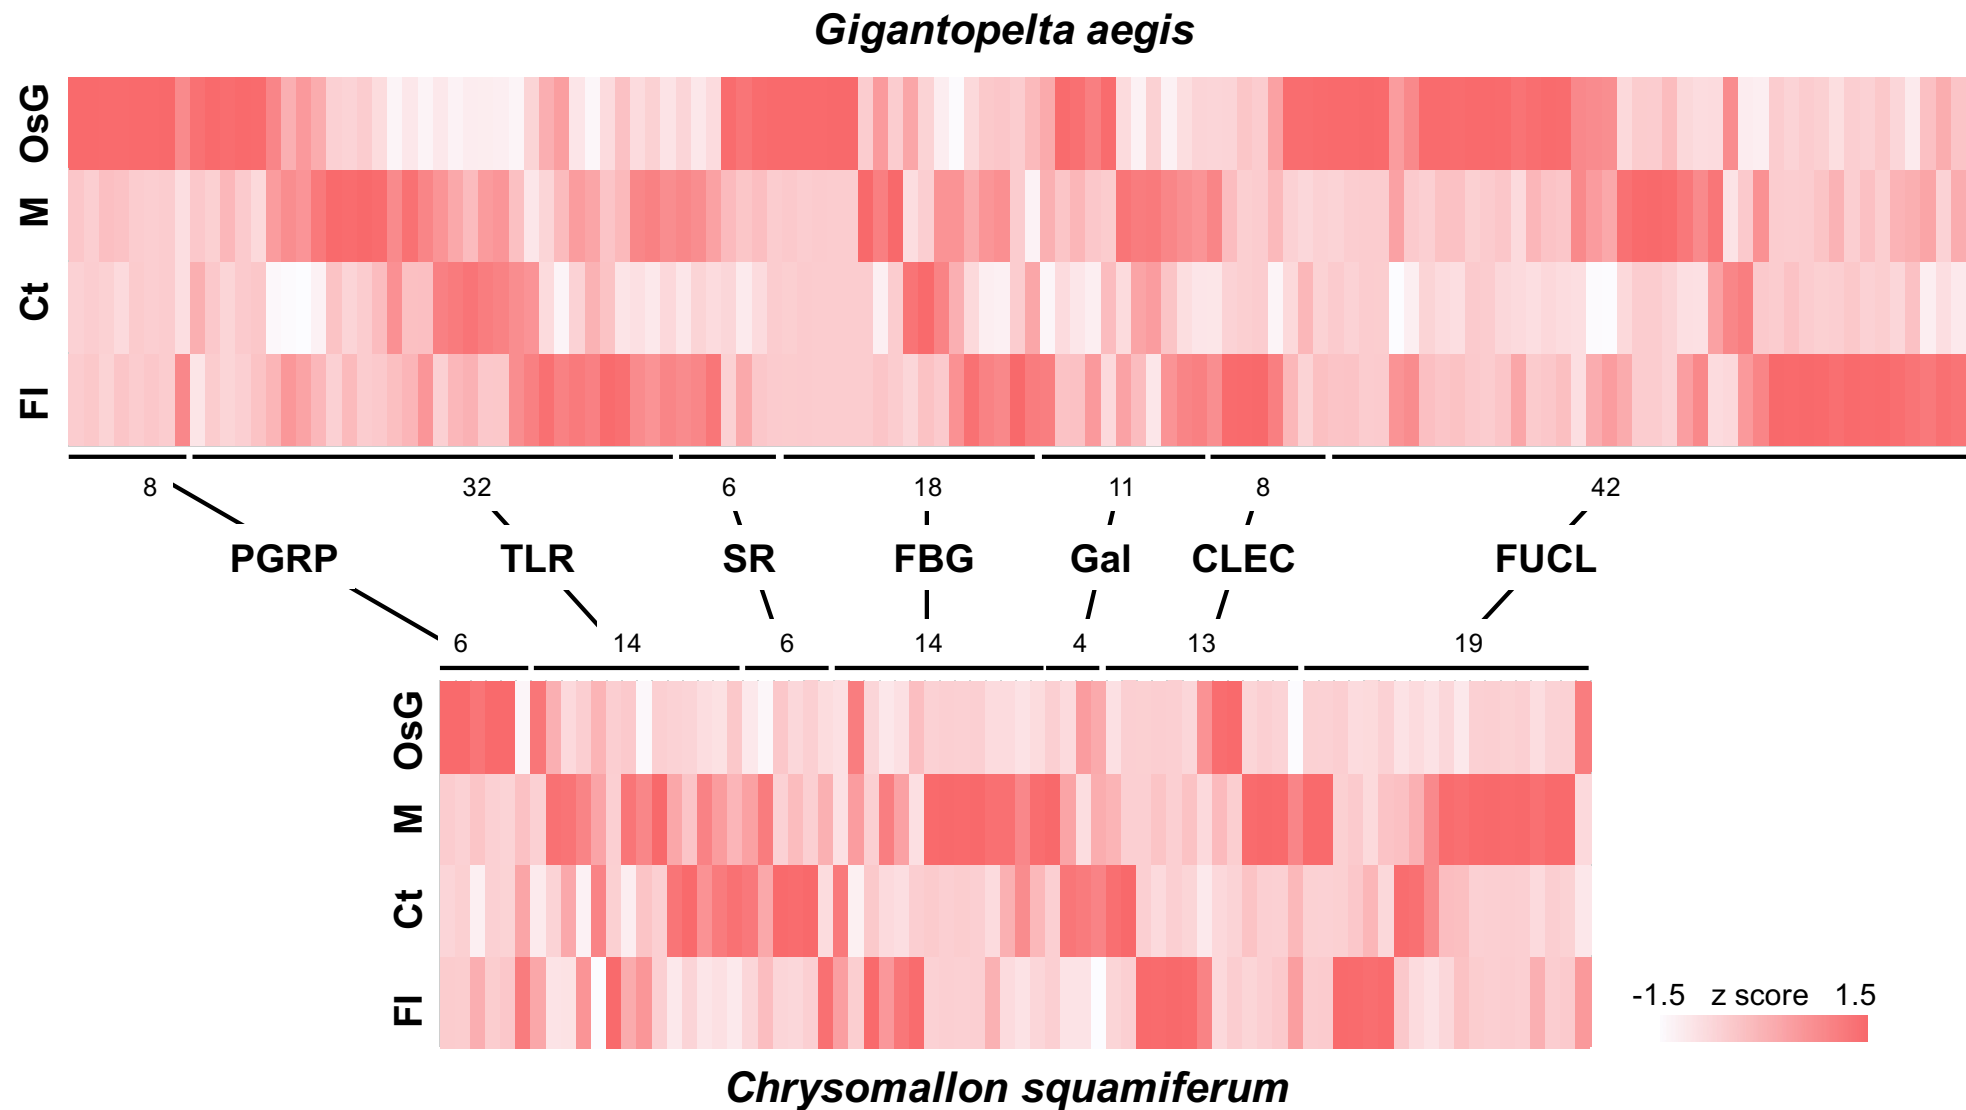

825  
826  
827  
828  
829

**Figure 5** Two heat maps showing gene abundances and expression levels of pattern recognition receptors, including peptidoglycan recognition proteins (PGRP), toll-like receptors (TLR), scavenger receptor (SR), fibrinogen-related proteins (FBG), galectins (Gal), C-type lectins (CLEC), and fucolectin (FUCL), in *Gigantopelta aegis* ( $n = 4$ ) and *Chrysomallon squamiferum* ( $n = 3$ )<sup>17</sup> (OsG: oesophageal gland; M: mantle; Ct: ctenidium; FI: internal tissue of foot). The numbers near the lines indicate the gene numbers of the gene families.

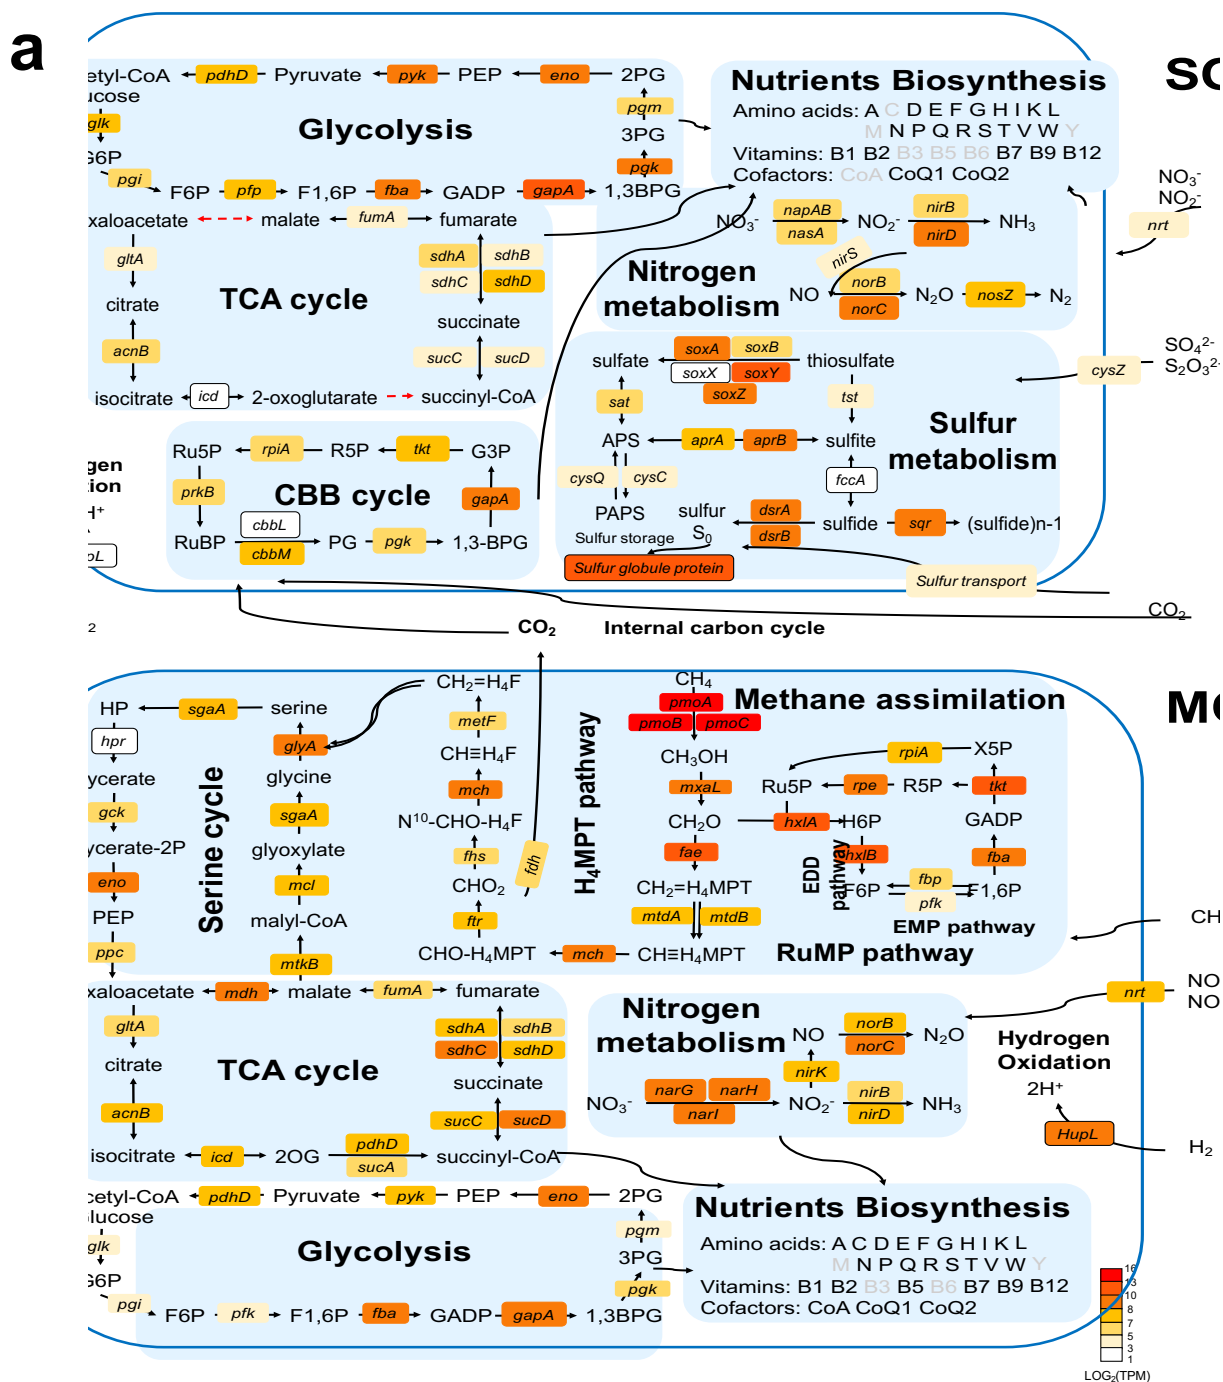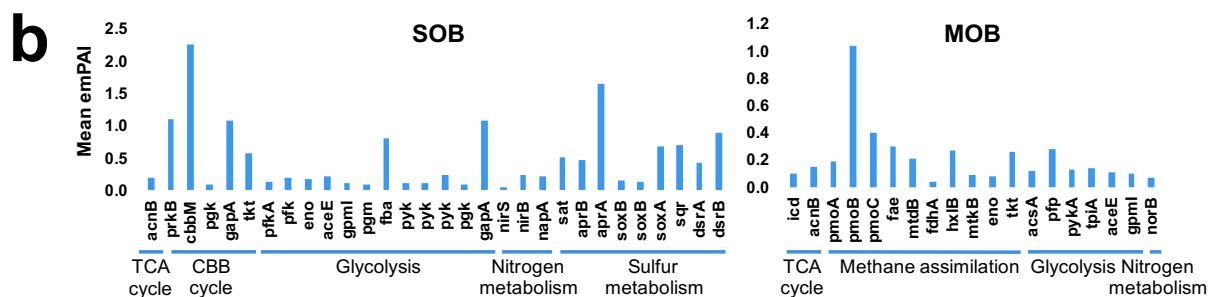

830  
 831 **Figure 6** Central metabolism of the dual symbionts of *Gigantopelta aegis*. **a**. Central metabolism  
 832 pathways in the sulphur-oxidising endosymbiont (SOB) and the methane-oxidising endosymbiont  
 833 (MOB). The boxes represent genes involved in the respective process, and they are colour coded  
 834 according to the Log-transformed normalized transcripts per kilobase million (TPM) value ( $n = 3$ )  
 835 showing the gene expression level in the metatranscriptome analysis (colour from red to light white  
 836 represents high expression level to low expression level; dash arrow represents that the gene is missing  
 837 in the genome). **b**. Protein abundances involved in the central metabolism of the SOB (left) and the MOB  
 838 (right). Protein abundances are reported as mean emPAI values ( $n = 3$ ) assessed in the metaproteome  
 839 analysis.
